# 1 Local structural dynamics of alpha-synuclein correlate with 2 aggregation in different physiological conditions

3 *Neeleema Seetaloo*<sup>1†</sup>, *Maria Zacharopoulou*<sup>2†</sup>, *Amberley D. Stephens*<sup>2</sup>, *Gabriele S. Kaminski Schierle*<sup>2</sup>,  
4 *Jonathan J. Phillips*<sup>1,3\*</sup>

5 <sup>1</sup>Living Systems Institute, University of Exeter, Stocker Road, Exeter, UK

6 <sup>2</sup>Department of Chemical Engineering and Biotechnology, University of Cambridge, Philippa Fawcett Drive,  
7 Cambridge, UK

8 <sup>3</sup>Alan Turing Institute, British Library, London, UK

9 †These authors contributed equally to the work

10 \*Corresponding author: [jj.phillips@exeter.ac.uk](mailto:jj.phillips@exeter.ac.uk)

11

## 12 **ABSTRACT**

13 In Parkinson's disease and other synucleinopathies, the intrinsically disordered,  
14 presynaptic protein alpha-synuclein misfolds and aggregates. We hypothesise that the  
15 exposure of alpha-synuclein to different cellular environments, with different chemical  
16 compositions, pH and binding partners, alters its biological and pathological function by  
17 inducing changes in molecular conformation. Our custom instrumentation and software  
18 enable measurement of the amide hydrogen exchange rates of wild-type alpha-synuclein at  
19 amino acid resolution under physiological conditions, mimicking those in the extracellular,  
20 intracellular, and lysosomal compartments of cells. We characterised the aggregation  
21 kinetics and morphology of the resulting fibrils and correlate these with structural changes  
22 in the monomer. Our findings reveal that the C-terminal residues of alpha-synuclein are  
23 driving its nucleation and thus its aggregation. Furthermore, the entire NAC region and  
24 specific other residues strongly promoted elongation of fibrils. This provides new detail on  
25 our current understanding of the relationship between the local chemical environment and  
26 monomeric conformations of alpha-synuclein.

## 27 **INTRODUCTION**

28 Parkinson's disease (PD) is a neurodegenerative condition affecting over 6.2 million  
29 people worldwide and this number is predicted to reach 13 million by 2040<sup>1</sup>. One of the

30 hallmarks of PD is the appearance of cytoplasmic inclusions in neurons, known as Lewy  
31 bodies and Lewy neurites, which are mostly constituted of  $\beta$ -sheet-rich aggregates of the  
32 protein alpha-synuclein (aSyn)<sup>2</sup>. Being intrinsically disordered, monomeric aSyn exists as  
33 an ensemble of interconverting protein structures<sup>3</sup>. In PD and other synucleinopathies,  
34 soluble disordered monomeric aSyn can misfold and aggregate, first forming oligomeric  
35 species before culminating to insoluble, highly structured amyloid fibrils<sup>4</sup>. aSyn is a 14.46  
36 kDa protein consisting of 140 amino acid residues divided into three domains: a highly  
37 positively charged amphipathic N-terminus (1-60), a central hydrophobic core (61-95) known  
38 as the non-amyloid beta component (NAC), and an acidic C-terminal tail (96-140)  
39 (Supplementary Figure 1). Unlike well-folded proteins, being natively unfolded, aSyn adopts  
40 a broad but shallow conformational space, meaning it can interchange with other conformers  
41 with minimal activation energy<sup>5</sup>. Using a variety of techniques including nuclear magnetic  
42 resonance and mass spectrometry, it has been found that the conformations adopted by  
43 monomeric aSyn are stabilised by long-range intramolecular electrostatic and hydrophobic  
44 interactions between its charged N- and C-termini, and between the C-terminus and the  
45 NAC region<sup>6-9</sup>. These intramolecular interactions account for its smaller radius of gyration,  
46 compared to the prediction of a 140-residue protein random coil, suggesting a partially-  
47 folded structure<sup>10</sup>. Disruptions in these long-range interactions, such as mutations, changes  
48 in the local environments and post-translational modifications (PTMs), can skew the  
49 conformational ensemble and disturb the stability of the protein, inducing misfolding and  
50 aggregation<sup>11</sup>. Therefore, it remains crucial to establish the correlation between monomeric  
51 conformation and aggregation propensity/kinetics of aSyn.

52 Whilst it has been found to be widely distributed in the body<sup>12</sup>, aSyn is particularly  
53 enriched at the presynapse (~20-40  $\mu$ M)<sup>13</sup> and has been proposed to participate in the  
54 homeostasis and recycling of synaptic vesicles<sup>14</sup>. aSyn encounters a number of different  
55 cellular and extracellular environments through various routes (summarised in Table 1<sup>15</sup>): (i)  
56 exposure to the extracellular space via exocytosis, apoptosis, exosome release, and release  
57 of cellular contents<sup>16</sup>; (ii) endocytosis into the endosomal/lysosomal pathway<sup>17</sup>; (iii)  
58 Metabolic imbalances leading to calcium and mitochondrial dysfunction<sup>18,19</sup>. aSyn in these  
59 different chemical environments will have a uniquely biased conformational ensemble<sup>20,21</sup>.  
60 This leads to the crucial question of whether these different conformational ensembles in  
61 the monomer correlate with the propensity and kinetics of aggregation. Furthermore, these

62 differences in structural dynamics of the monomer may result in different fibril morphologies,  
63 which could be indicative of alternative aggregation mechanisms.

64 Furthermore, a variety of oligomer species<sup>22</sup> and fibril polymorphs<sup>23</sup> have been  
65 discovered, with different biophysical properties and levels of toxicity<sup>24–26</sup>, possibly  
66 dependent on the local environments in which they arise, familial mutations<sup>27–32</sup>, or PTMs<sup>33</sup>.  
67 There is growing evidence supporting the idea that the monomeric aSyn conformation and  
68 the surrounding environment affects fibril formation<sup>34,35</sup>. Here, we aim to understand whether  
69 and how conformational changes in the monomer may affect the aggregation kinetics and  
70 fibril morphologies across different solution conditions mimicking cellular and extracellular  
71 compartments in vitro.

72 **Table 1:** Composition of extracellular, intracellular, and lysosomal compartments used in this study  
73 (adapted from Stephens et al<sup>15</sup>). The maximum potential concentration was used for all ions.

| Ion                     | Extracellular<br>concentration (mM) | Intracellular<br>concentration (mM) | Lysosomal<br>concentration (mM) |
|-------------------------|-------------------------------------|-------------------------------------|---------------------------------|
| Na <sup>+</sup>         | 143                                 | 15                                  | 20                              |
| K <sup>+</sup>          | 4                                   | 140                                 | 60                              |
| Ca <sup>2+</sup>        | 2.5                                 | 100 nM                              | 0 <sup>a</sup>                  |
| Mg <sup>2+</sup>        | 0.7                                 | 10                                  | 0                               |
| pH                      | 7.4                                 | 7.2                                 | 4.9                             |
| Buffer<br>system        | 20 mM Tris                          | 20 mM Tris                          | 20 mM citrate                   |
| References <sup>b</sup> | 110746 BNID <sup>36</sup>           | <sup>36</sup> 103966,110746 BNID    | <sup>37,38</sup> 114028 BNID    |

74 <sup>a</sup>Conflicting reports as to whether lysosomes are Ca<sup>2+</sup> stores (0.5-0.6 mM)<sup>39</sup>.

75 <sup>b</sup>BNID numbers correspond to The Database of Useful Biological Numbers; <http://bionumbers.hms.harvard.edu/search.aspx>.

77 Here, we obtained data at high structural and temporal resolution for the aSyn  
78 monomer under physiologically relevant conditions. This was achieved by hydrogen-  
79 deuterium exchange mass spectrometry (HDX-MS) on the millisecond timescale coupled  
80 with a gas-phase ‘soft fragmentation’ technique known as electron-transfer dissociation  
81 (ETD). We correlated these data to Thioflavin-T (ThT-) based aggregation kinetics and fibril  
82 morphology, assessed by atomic force microscopy (AFM). Our results show that the solution  
83 conditions assessed in this study all lead to distinct aggregation kinetics, fibril morphologies

84 and monomeric conformations. More importantly, our correlative analyses reveal specific  
85 local conformational changes in the aSyn monomer that influence the separate stages of  
86 aggregation, namely the nucleation and elongation steps.

## 87 RESULTS

### 88 Aggregation propensity increases from Tris-only < Extracellular < Intracellular < 89 Lysosomal conditions *in vitro*

90 We first investigated whether the aggregation propensity of aSyn differed across four  
91 conditions with varying pH and ionic compositions, mimicking the extracellular, intracellular  
92 and lysosomal environments, alongside our baseline Tris-only condition (20 mM Tris, pH  
93 7.4). To do so, we used a ThT-based fluorescence assay. The ThT molecule emits  
94 fluorescence when bound to rich fibrillar  $\beta$ -sheet structures, informing us on the process of  
95 aggregation<sup>40</sup> (Figure 1A, 1C-1F). In the ThT-based assay, the time before the onset of  
96 fluorescence, lag time ( $t_{lag}$ ), is indicative of the nucleation phase of fibril formation and the  
97 slope of the exponential growth ( $k_{agg}$ ) describes the elongation phase (Figure 1B). Upon the  
98 addition of physiologically relevant salts, the aSyn monomer nucleation lag time is reduced  
99 by 45% from 113 h to 62 h and the elongation rate  $k_{agg}$  is increased by 42% (0.024 h<sup>-1</sup> to  
100 0.034 h<sup>-1</sup>), as can be seen from Figure 1C and 1E, respectively.

101 As ThT-based fluorescence intensity can change due to presence of different fibril  
102 polymorphs and solution conditions<sup>41-43</sup>, we confirmed the extent of aggregation by  
103 quantifying the remaining monomer concentration at the end of the assays (Figure 1F).  
104 Thus, the aggregation propensity can be described as the reciprocal of the remaining  
105 monomer. The order of aggregation propensity from highest to lowest was: Lysosomal >  
106 Intracellular > Extracellular > Tris-only. Importantly, the cellular and extracellular  
107 compartment conditions all had a higher aggregation propensity than the Tris-only condition,  
108 showing that when deprived of biological salts, Tris-only is not physiologically relevant  
109 despite being at a physiological pH of 7.4. This may be particularly significant for drug  
110 discovery efforts which often use aSyn protein in buffers without a full complement of  
111 dissolved physiological salts

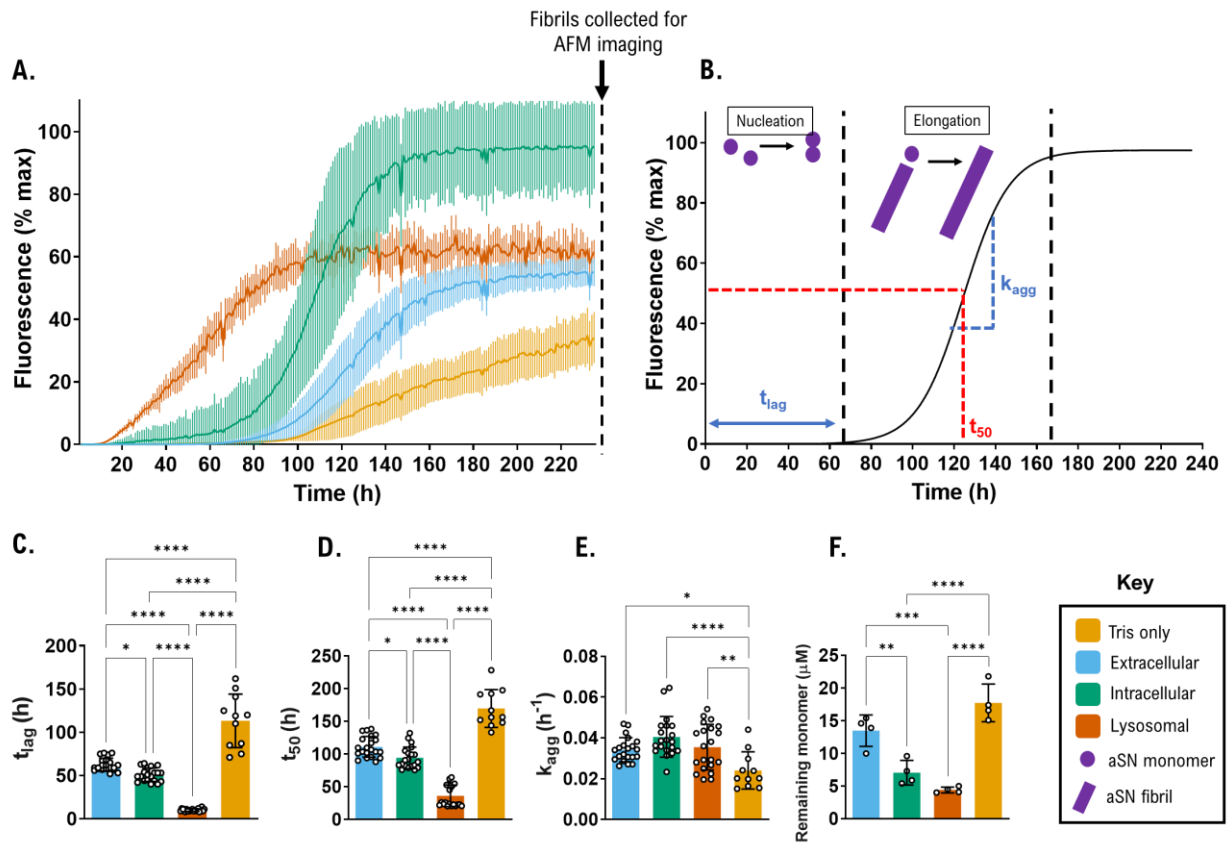

112

113 **Figure 1: ThT-based aggregation assays reveal distinct aggregation behaviour for aSyn when**  
 114 **equilibrated in different physiological solution conditions. (A)** Aggregation kinetics of aSyn in  
 115 Tris-only (yellow), extracellular (blue), intracellular (green) and lysosomal (orange) solution  
 116 conditions were measured using ThT fluorescence intensity and plotted as % of maximum  
 117 fluorescence at 480 nm. Trace shows average and standard deviation of up to 9 technical replicates.  
 118 Biological replicate 1 shown (see Supplementary Figure 2 for all biological replicates); **(B)** The  
 119 aggregation phases of nucleation (lag time) and elongation (slope of curve) are shown schematically.  
 120 **(C-F)** Lag time ( $t_{lag}$ ), time to reach 50% of maximum aggregation ( $t_{50}$ ) and slope ( $k_{agg}$ ) were calculated  
 121 and significance testing was performed by a one-way ANOVA with Tukey's multiple comparisons  
 122 post-hoc test. The upper and lower 95% confidence interval is shown and p-value significance of  
 123 differences between cellular conditions are indicated ( $p < 0.05^*$ ,  $p < 0.01^{**}$ ,  $p < 0.001^{***}$ ,  $p <$   
 124  $0.0001^{****}$ ). The remaining monomer concentration was determined using SEC-HPLC by injecting  
 125 25  $\mu L$  of soluble sample from each well in the ThT assay and calculating the area of the aSyn  
 126 monomer peak in relation to a standard curve of known aSyn monomer concentrations. Remaining  
 127 monomer concentrations were measured from the area under the peak and calculated using a  
 128 standard curve of known concentrations. Data shown in C-E correspond to  $n=21$  for the extracellular,  
 129 intracellular and lysosomal conditions, and  $n=11$  for Tris-only. Data in F correspond to  $n=4$ .

130 corresponding to the relevant physiological compartment. We also note that aggregation  
131 propensity correlates with pH — the lower the pH, the greater the aggregation propensity.

132 The lysosomal condition corresponds to the fastest aSyn aggregation rate, as has been  
133 previously shown<sup>44</sup>. The different aggregation kinetics and propensities that we observed  
134 logically provoke the question as to whether they also result in different aSyn fibril  
135 polymorphs, thus we next imaged the fibrils in each case.

### 136 **Different physiological conditions result in five distinct fibril polymorphs**

137 Next, we examined the fibrils formed under each condition to identify any resulting  
138 morphological variations. As previous studies have shown, the morphology of aSyn fibrils  
139 are highly sensitive to solution conditions such as pH and ionic composition<sup>45,46</sup>. The  
140 properties of the different polymorphs such as toxicity and seeding potency may differ<sup>24</sup>. The  
141 AFM analysis showed that all conditions had a percentage of the total population as non-  
142 periodic, or rod fibrils, that we termed polymorph p1 (Figure 2). Tris-only fibrils were  
143 predominantly comprised of twisted polymorphs p2 (Figure 2A and 2E). These were divided  
144 into two sub-polymorphs p2a and p2b, as they both had a long periodicity of ~400 nm, but  
145 had different heights, with polymorph p2b (12-17 nm) having approximately double the  
146 height of polymorph p2a (7-10 nm). This can be rationalised by two protofibrils (p2a)  
147 associating to form a mature fibril (p2b)<sup>47</sup>. Polymorph p2b formed 60% of the total fibril  
148 population, with the lower height p2a a further 24% and the rod polymorph p1 making up  
149 only 16% (Figure 2E). The extracellular conditions created a single population of protofibrils  
150 containing the periodic polymorph p3a, which was more tightly twisted than the Tris-only  
151 fibrils, with a short periodicity of ~100 nm (Figure 2B). None of the protofibrils were found  
152 with heights more than 8 nm, suggesting they had not laterally associated or twisted together  
153 under extracellular conditions. The lysosomal condition created two periodic fibril  
154 populations: (i) polymorph p3a; indistinguishable from the extracellular condition and (ii)  
155 polymorph p3b; a mature fibril of the same periodicity but double the height of protofibril p3a  
156 (Figure 2D). In both, the extracellular and the lysosomal conditions, most of the fibril  
157 populations were of p3a (7-9 nm), comprising 80% and 59%, respectively (Figure 2F and  
158 2H). The intracellular fibril population was more diverse and included polymorphs found  
159 across the three other conditions, with the majority (46%) of the fibrils being p2b (Figure 2C



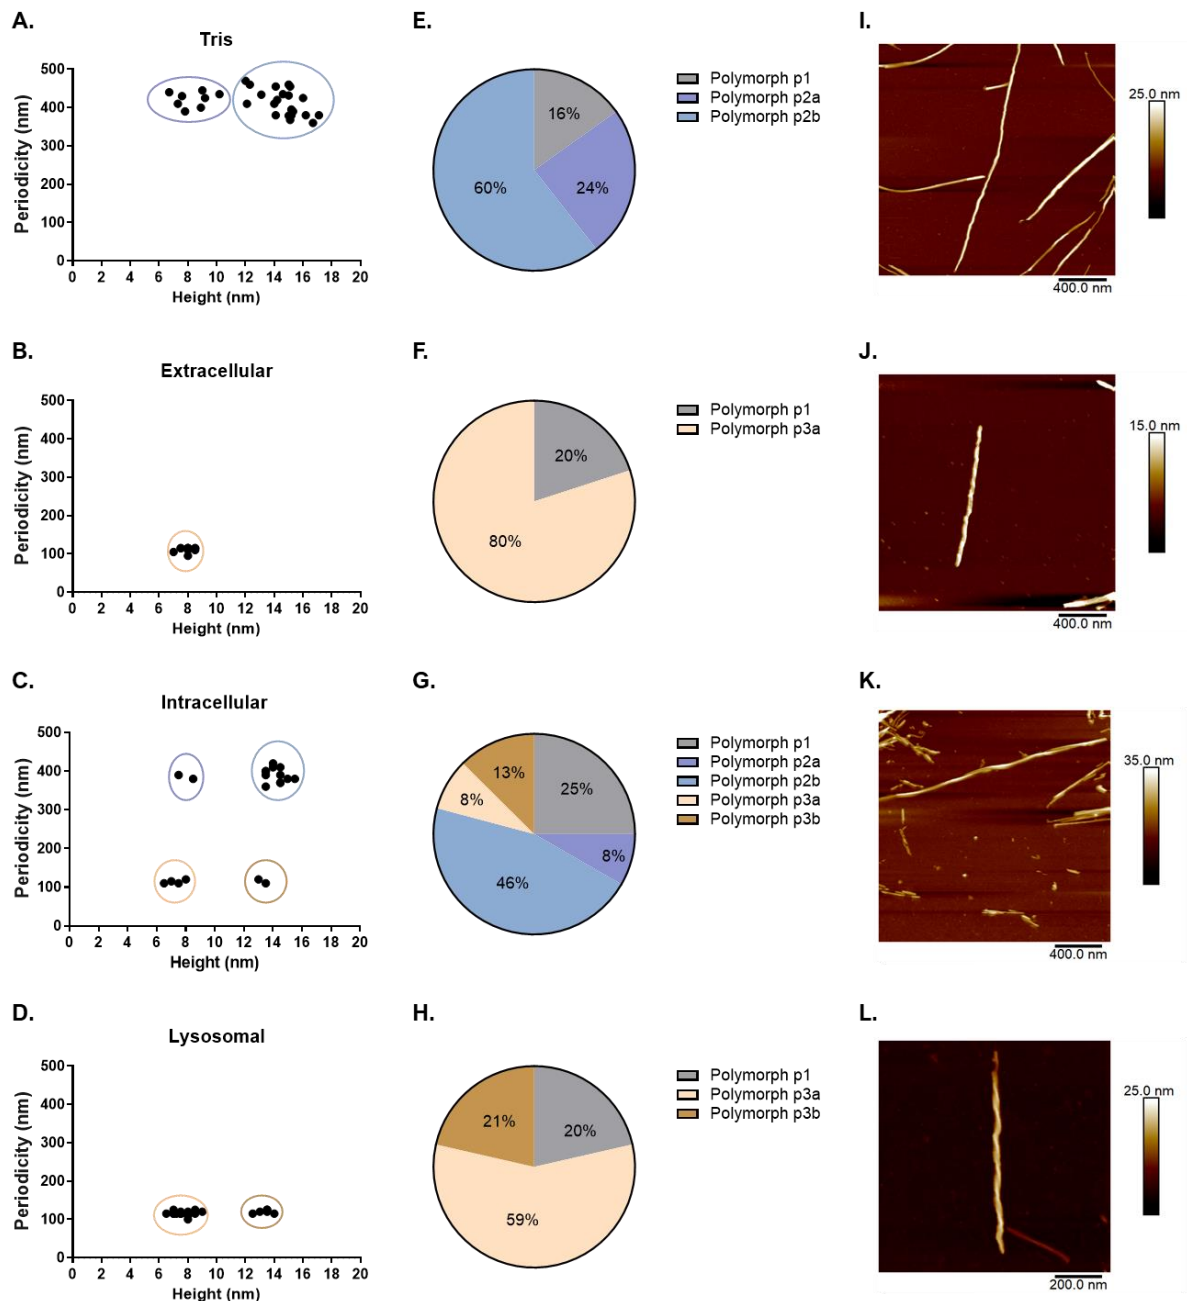

160

161 **Figure 2: AFM analysis on the aSyn fibrils formed from each condition reveals distinct**  
 162 **polymorphs.** Atomic force microscopy was performed on the fibrils developed in each cellular,  
 163 extracellular and Tris-only condition. **(A)-(D)** show plots of the periodicity against the height in nm for  
 164 each condition. As a guide to the eye, groups of distinct polymorphs are highlighted by a colour  
 165 ellipse. Non-periodic fibrils (or rods) are not depicted. **(E)-(F)** show pie charts representing the  
 166 abundance of each polymorph population. Polymorph p1 (grey) represents fibril rods, while  
 167 polymorphs p2-p3 are twisted fibrils of varying periodicities and heights, with colours matching the  
 168 cluster circles in **(A)-(D)**. **(I)-(L)** show representative AFM images of the main fibril polymorph in each  
 169 condition. Note scale bars and height colour bars are not identical.

170 and 2G). Figure 3 shows a summary of the different twisted polymorph populations formed  
171 across the conditions tested.

172

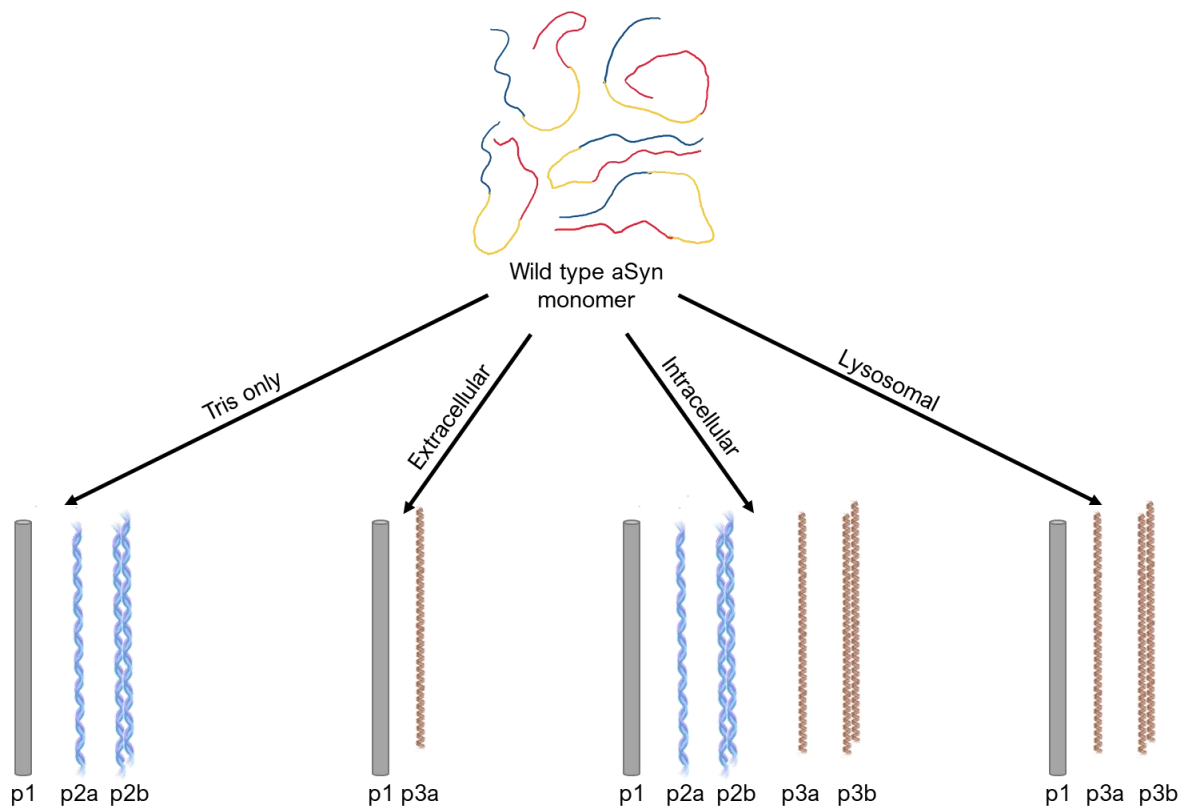

173

174 **Figure 3: Schematic of the twisted fibril polymorphs formed from wild type aSyn for each**  
175 **condition.** Tris-only conditions form less periodic twisted polymorphs, p2a and p2b (blue);  
176 Extracellular and lysosomal conditions form highly twisted fibrils, p3a and p3b (brown); Intracellular  
177 conditions form a mixture of the p2 and p3 polymorphs.

178 The AFM analysis shows that the cellular, extracellular and Tris-only conditions cause  
179 aSyn to form fibrils with five distinct morphologies, p1, p2a, p2b, p3a and p3b. We next  
180 sought to identify whether this stems from different aSyn monomer conformations under the  
181 different solution conditions.

### 182 **Monomer conformations vary with solution conditions**

183 We hypothesised that the conformational ensemble and local structure of the aSyn  
184 monomer could be affecting the aggregation kinetics (as shown in our previous paper<sup>21</sup>) and  
185 the resulting fibril morphologies. To measure the local (i.e. sub-molecular) structural and  
186 conformational dynamics of the monomer in the different environmental conditions, we



187 employed HDX-MS on the millisecond timescale. Protein conformational dynamics  
188 exquisitely influence the exchange of amide hydrogens in the polypeptide backbone, which  
189 can be sensitively measured by HDX-MS. The sub-second kinetics are essential to generate  
190 data on weakly-stable and intrinsically disordered protein monomers, such as aSyn, under  
191 physiological conditions – in particular at higher pH found in extracellular and intracellular  
192 environments<sup>48</sup>. Thanks to our prototype instrument<sup>49</sup>, we were able to capture the  
193 exchange kinetics of aSyn monomer from 50 ms, compared to a conventional lower limit of  
194 30 s for standard commercially available HDX systems. We coupled HDX-MS with ‘soft  
195 fragmentation’ by ETD<sup>50</sup> in order to further increase the structural resolution of the data, with  
196 21% of aSyn resolved at the single amino acid level (Supplementary Figure 3). Thus, aSyn  
197 conformational perturbations can be highly localised to regions of the protein that are  
198 involved in specific processes, in this case, aggregation. These HDX-MS data measure the  
199 ensemble average of monomeric aSyn conformers formed under the physiological  
200 conditions.

201 Intrinsic amide hydrogen/deuterium-exchange (HDX) varies with pH and ionic  
202 strength, which must be corrected for in order to measure only the HDX differences that  
203 result from the structural dynamics of the aSyn protein. We first used the unstructured  
204 peptide bradykinin to empirically calibrate the chemical exchange rate in each solution  
205 condition<sup>50–52</sup> (see *Methods*). This resulted in a set of correction factors that permit the  
206 normalisation of experimental data in each solution condition to a common scale  
207 (Supplementary Figure 4). Therefore, we were able to robustly determine which the  
208 significant conformational changes were in monomeric aSyn between the different chemical  
209 environments. Briefly, we used the hybrid significance testing method<sup>53</sup>, combining the  
210 results of a Welch’s t-test and determining a global significance threshold corresponding to  
211 the experimental error, to identify significant differences between the conditions for the  
212 deuterium uptake per labelling timepoint and per amino acid (see *Methods* and Seetaloo et  
213 al<sup>50</sup>).

214 Figure 4 shows the HDX-MS results as a heatmap showing only the significant  
215 differences in uptake at each experimental timepoint, from 50 ms to 30 s, in a pairwise  
216 manner between the conditions. Part of the C-terminus is significantly protected in the  
217 extracellular state, compared to the intracellular and lysosomal states (blue residues in

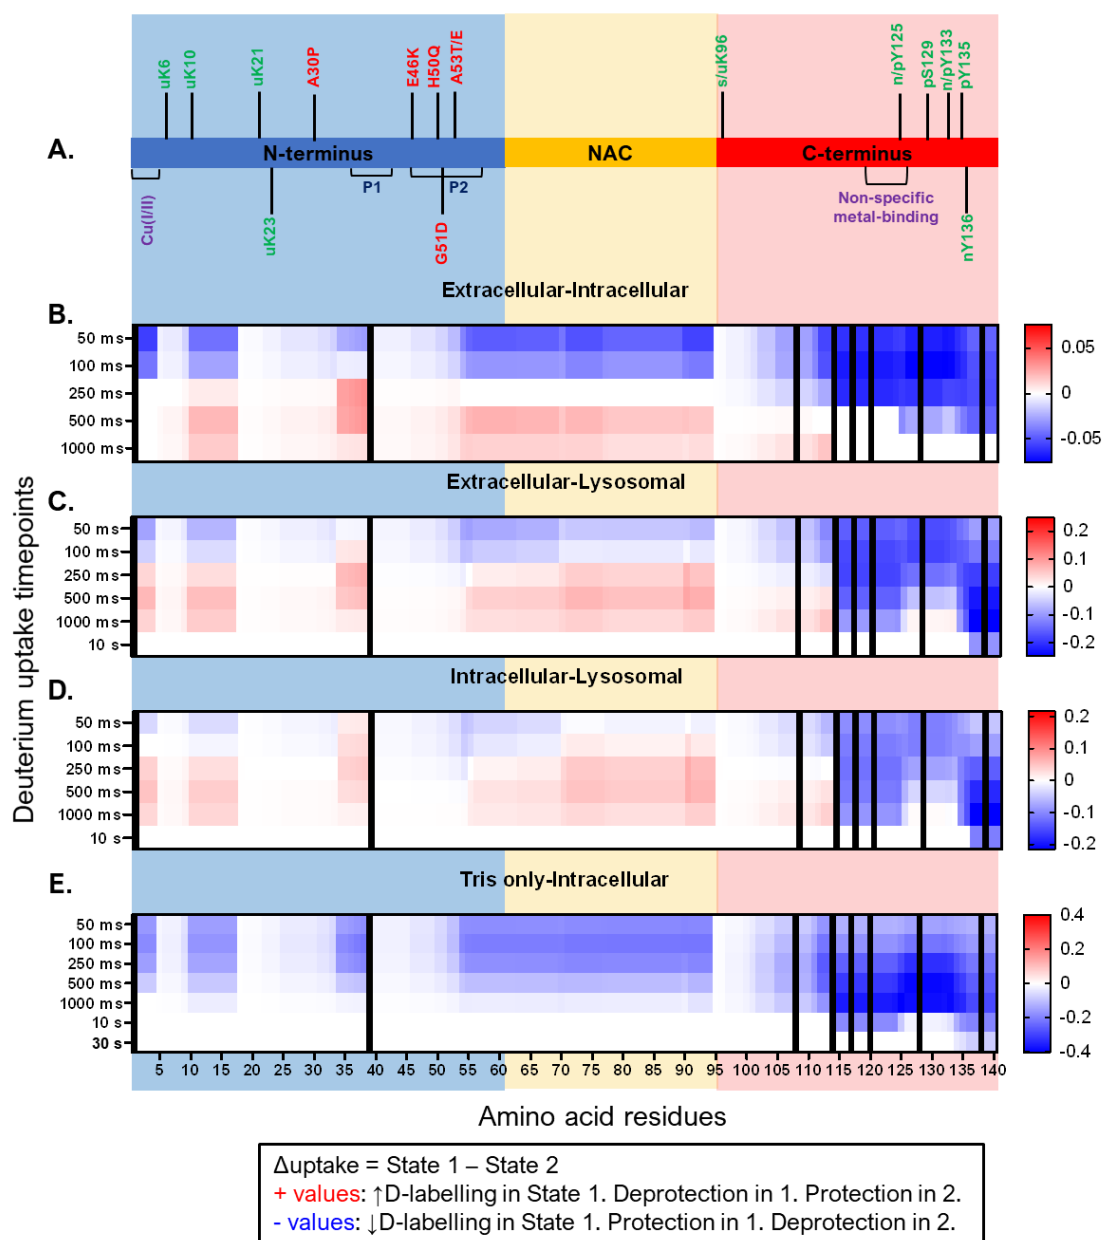

218

219 **Figure 4: HDX-MS reveals localised differences in conformations of monomeric aSyn across**  
 220 **all the conditions. (A)** Schematic of aSyn monomer with important features and domains shown.  
 221 **(B-E)** Heatmap showing significant differences (non-white) in deuterium uptake per timepoint during  
 222 an on-exchange reaction between STATE 1 – STATE 2 (title of each plot). Hybrid significance testing  
 223 with Welch's t-test p-value of 0.05 and global significance threshold of 0.36 Da calculated. Data for  
 224 three biological replicates shown. Data are resolved to the amino acid level, down to single residues  
 225 in certain regions. Positive values are in red and represent increased uptake in STATE 1, whereas  
 226 negative values are in blue and represent increased uptake in STATE 2. Increased uptake indicates  
 227 more solvent exposure and/or less participation in stable hydrogen-bonding networks. Tris-only  
 228 comparisons with extracellular and lysosomal similar to E, not shown here but in Supplementary  
 229 Figure 4.

230 Figure 4B-C). Conversely, the N-terminus and NAC residues 2-4, 10-17, 34-38 and 53-94  
231 are deprotected (red residues in Figure 4B-C). A similar pattern is seen for the  
232 extracellular/intracellular vs lysosomal differential across residues 1-112, with the remainder  
233 of the C-terminal sequence showing a slightly different pattern of uptake difference. On the  
234 other hand, the comparisons of Tris-only versus all the physiological states (Figure 4E and  
235 S5) show protection against HDX throughout, with highest protection conferred to the C-  
236 terminus. The differential HDX-MS analysis confirms that the aSyn monomer varies in  
237 conformational ensemble across the physiological and Tris-only conditions studied here and  
238 localises the ensemble averaged conformational changes.

### 239 **Exposure of C-terminus residues 115-135 are key for nucleation**

240 We then sought to correlate the localised structural perturbations in the monomeric  
241 aSyn with the nucleation and elongation phases of the aggregation kinetics. We aimed to  
242 determine if there were certain structural motifs or regions in the aSyn monomer whose  
243 protection or deprotection to HDX reveal a contribution to each aggregation phase.

244 We performed a Pearson correlation analysis at each amino acid in aSyn, with a 99%  
245 confidence limit, between the nucleation lag time ( $t_{lag}$ ) from ThT-based assays (Figure 1)  
246 and the observed rate constant ( $k_{obs}$ ) of hydrogen-exchange (Figure 5A-B; Supplementary  
247 Figure 2). Table S1 shows the Pearson correlation coefficients  $R$  at each amino acid. C-  
248 terminus residues 115-135 are very strongly negatively correlated with  $t_{lag}$  ( $R < -0.9$ ), while  
249 the rest of the C-terminus is strongly negatively correlated ( $-0.9 < R < -0.7$ ), albeit to a lesser  
250 extent (Figure 5B). Similarly, certain localised regions of the N-terminus (10-33 and 40-60)  
251 and the NAC region (61-69) are also strongly negatively correlated ( $-0.9 < R < -0.7$ ), but to  
252 a lesser extent. Therefore, aSyn conformations, where the above-mentioned residues are  
253 exposed and/or their hydrogen-bonding networks are destabilised, are found to nucleate  
254 more rapidly.

### 255 **Exposure of N-terminus and NAC regions drives fibril elongation**

256 We next correlated the rate of fibril growth, defined by the slope of the exponential phase  
257 ( $k_{agg}$ ) from the ThT-based assays with the observed rate constant ( $k_{obs}$ ) as before. We have  
258 performed a Pearson correlation analysis, as above, and show a heatmap of the correlation  
259 coefficients  $R$  from the  $k_{obs}$ - $k_{agg}$  correlation along the protein sequence (Figure 5D-E). A  
260 strong positive correlation ( $0.7 < R < 0.9$ ) can be seen between the  $k_{obs}$  and  $k_{agg}$  throughout  
261 the entire NAC region (residues 61-95) and for N-terminus residues 2-5, 10-17, 25-33, and

262 46-60. The C-terminal domain residues 101-113 also showed strong positive correlation  
263 coefficients ( $0.7 < R < 0.9$ ) compared to the rest of the protein sequence. This means that  
264 the more exposed or less involved in hydrogen-bonding these residues are, the higher the  
265 elongation rate, implying faster fibril growth. Interestingly, C-terminal residues 115-135 that  
266 previously proved to be critical for the nucleation phase, are only moderately influential for  
267 the process of fibril elongation. Thus, monomeric conformations where the NAC region,  
268 together with the above-mentioned sites, is exposed to solvent water and/or has a  
269 destabilised H-bonding network, are found to accelerate fibril elongation.

## 270 **DISCUSSION**

271 Being intrinsically-disordered, aSyn monomer occupies a broad but shallow  
272 conformational space as it adopts a wide range of conformations stabilised by long-range  
273 intramolecular electrostatic and hydrophobic interactions<sup>7,8,54</sup>. Consequently, it is  
274 challenging to define the variously meta-stable conformers using integrated structural  
275 biology tools<sup>20,26</sup>. Disruption of these intramolecular interactions can be caused by  
276 mutations<sup>27-32</sup>, local environmental changes, such as during pre-synaptic calcium  
277 signalling<sup>21</sup> or by post-translational modifications<sup>33,55-57</sup>. This in turn can trigger misfolding  
278 and initiate aggregation<sup>11</sup>. This underlines the crucial importance that these physiological  
279 and patho-physiological functionally distinct conformers of aSyn are characterised and,  
280 moreover, at a structural resolution sufficient to correlate structure with functional attributes.

281 As aSyn experiences a plethora of chemical environments and binding partners at  
282 the presynapse, we hypothesise that its monomeric form will exhibit changes in  
283 conformation under different microenvironments. Therefore, in the current study, we have  
284 focused on whether the aSyn monomer conformation is altered under various conditions at  
285 the presynapse. We sought to mimic physiologically relevant cellular and extracellular  
286 environments (extracellular, intracellular, and lysosomal) and whether/how these  
287 conformational changes lead to distinct aggregation kinetics and fibril morphologies.

288 In the current study, we show that the four solution conditions under investigation:  
289 Tris-only (control), extracellular, intracellular, and lysosomal states, aggregated at different  
290 nucleation times and elongation rates, determined by ThT-based aggregation assays.  
291 Analysis of resulting fibrils by AFM revealed an assortment of fibril polymorphs across the  
292 four environments, indicating a link between the net-charge in the C-terminal domain and  
293 fibril twist. More specifically, we found that a net charge reduction at the C-terminus led to

294 the formation of fibril polymorphs with increased periodicity. Subsequently, we were able to  
295 identify subtle perturbations in the conformational ensembles of the wild-type aSyn  
296 monomer in the physiologically relevant solution conditions at high structural resolution  
297 using millisecond HDX-MS coupled with ETD. Ultimately, we were able to determine  
298 correlations between the monomer conformers and specific stages of aggregation:  
299 nucleation and elongation.

300 We correlated the different cellular aggregation profiles from the ThT-based assays  
301 with the  $k_{obs}$  from HDX-MS and discovered that the C-terminal residues 115-135 crucially  
302 influenced the nucleation of the fibrils, as shown by the very strong correlation coefficients  
303 spanning this region. Previous studies have shown that the truncation or charge  
304 neutralisation of the C-terminus increases the rate of aggregation. As we saw, the  $k_{obs}$  for  
305 HDX at the C-terminus strongly negatively correlated with  $t_{lag}$ , indicating that the more  
306 exposed it is or the less involved in stable H-bonding network, the faster the nucleation.  
307 When the C-terminus is truncated, which mimics a fully exposed/unstructured conformation,  
308 this leads to increased aggregation, which is also observed when the C-terminus charge is  
309 neutralised<sup>58,59</sup>. Upon charge reduction at the C-terminus (possibly via calcium-binding or  
310 lowering of pH), a drop in the long-range interactions and electrostatic repulsions may lead  
311 to increased exposure or destabilised H-bonding participation, resulting in faster nucleation.  
312 On the other hand, some residues (2-5, 10-18, 25-33, 46-60, 61-95 and 100-113) were found  
313 to promote fibril growth when deprotected against HDX (deep orange in Figure 6D). Perhaps  
314 unsurprisingly, the entire NAC was found to be highly important in the process of fibril  
315 growth, in agreement with previous deletion and truncation studies<sup>60</sup>. Furthermore, recent  
316 studies have identified two motifs at the N-terminus, P1 (residues 36-42) and P2 (residues  
317 45-57) to be critical for aggregation<sup>61</sup>. Our high-resolution analysis shows that exposure of  
318 motif P2 drives both nucleation and fibril growth processes of aggregation, and to a higher  
319 extent than that of motif P1. The HDX-MS differential analysis revealed that P1 and P2 were  
320 more exposed in the extracellular state compared to both the intracellular and lysosomal  
321 states (red residues in Figure 4B-C).

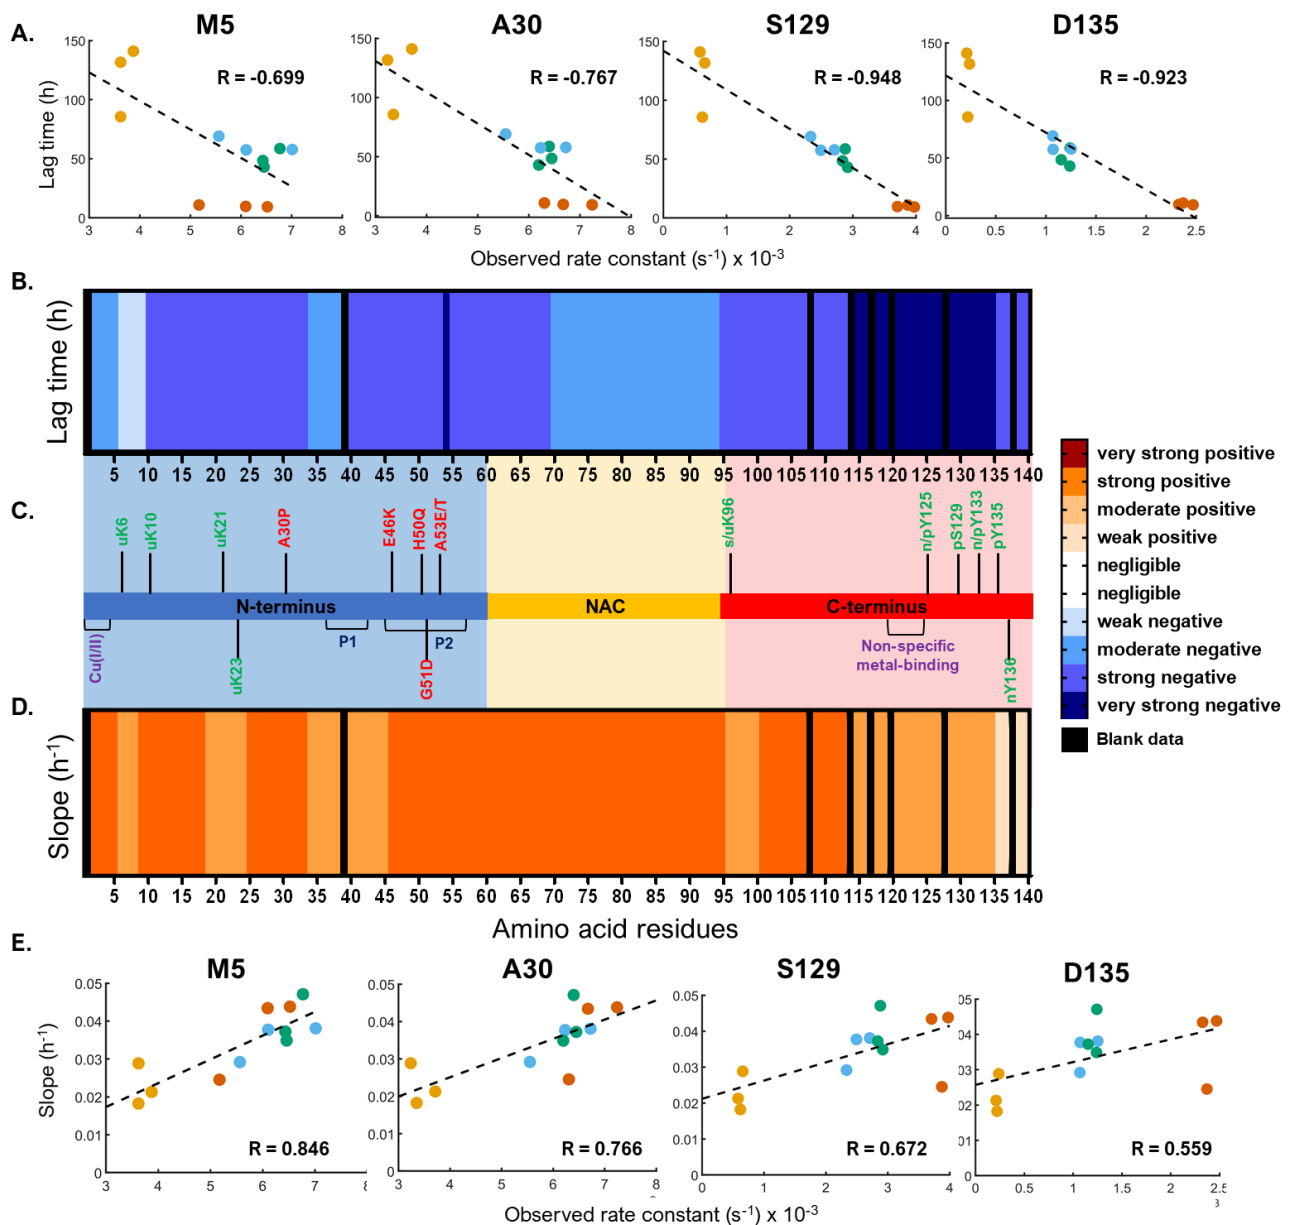

322

323 **Figure 5: Correlation analysis reveals regions of the protein important to the nucleation and**  
 324 **elongation phases of the aggregation kinetics. (A)** Correlation plots of lag time against  $k_{obs}$  for  
 325 selected amino acid residues – M5 (copper-binding site), A30 (familial mutation site), S129 and D135  
 326 (post-translational modification sites); **(B)** Heatmap of the Pearson correlation coefficients ( $R$ )  
 327 between the lag time and  $k_{obs}$ ; **(C)** Schematic of the aSyn sequence showing the three domains (N-  
 328 terminus in blue, NAC in yellow, C-terminus in red), sites of selected familial mutations (red), metal-  
 329 binding (purple) and post-translational modifications (green); **(D)** Heatmap of the Pearson correlation  
 330 coefficients ( $R$ ) between the aggregation slope and  $k_{obs}$ ; **(E)** Correlation plots of aggregation slope  
 331 against  $k_{obs}$  for selected amino acid residues (same as A). Colour bar legend shown with following  
 332 categories of  $R$ : negligible: 0-0.3, weak: 0.3-0.5, moderate: 0.5-0.7, strong: 0.7-0.9, very strong: 0.9-  
 333 1. Black regions represent unavailable data.



334 Interestingly, we observed that fibrils formed under extracellular and lysosomal  
335 conditions led to the same more tightly twisted fibrils, polymorph p3<sup>62</sup>. The only significant  
336 difference between the aggregates formed under these two conditions was the propensity  
337 of the lysosomal buffer to drive assembly of p3a protofibrils into p3b mature fibrils. In  
338 common, both conditions lead to a net charge reduction at the C-terminus, either by calcium-  
339 binding<sup>63</sup> or neutralisation of certain acidic residues at the lower pH<sup>64</sup>, respectively, which  
340 would disrupt the long-range electrostatic and hydrophobic interactions that stabilise the  
341 monomer in solution<sup>21</sup>. It is likely that a change in the protofibril structure and/or charge halts  
342 the formation of mature fibrils by affecting their association. CryoEM studies have revealed  
343 the formation of a different aSyn polymorph upon the E46K point mutation, which led the  
344 protofibrils to adopt a different fold compared to previously resolved wild-type aSyn  
345 structures<sup>65,66</sup>. It is possible that a different monomer conformation (lysosomal vs  
346 extracellular) could lead to different protofibril packing and reduced stability of the mature  
347 fibril. This suggests that the same aggregation pathway may be followed to generate the  
348 p3a fibrils from the aSyn monomer in the extracellular and lysosomal environments, but that  
349 the mature fibrils have considerably higher stability under the lysosomal conditions. From  
350 our HDX-MS vs ThT correlative analyses, the C-terminus deprotection was also found to  
351 correlate with the nucleation phase of aggregation, agreeing with previous work<sup>58,67,68</sup>.  
352 Therefore, we can infer that polymorph p3 is determined by an aSyn monomeric  
353 conformation with a C-terminus with lower net charge during the nucleation phase.

354 The intracellular condition formed the most heterogeneous fibril populations out of  
355 the four conditions, as it had all the polymorphs of the other conditions combined. It also  
356 gives rise to the widest range of fibril elongation rates (Figure 1E). The ensemble average  
357 of structural conformers, as measured by HDX-MS, was broadly similar between intra/extra-  
358 cellular conditions, however, the intracellular environment stabilises specific sites in the N-  
359 terminal region and to a far greater degree destabilises the C-terminal region (Figure 4B).  
360 The C-terminal protection can be attributed to calcium binding<sup>69</sup>. The intracellular state also  
361 contains Mg<sup>2+</sup>, which is known to bind to aSyn<sup>20</sup>. It is possible that in this case, Ca<sup>2+</sup> binds  
362 preferentially to the Mg<sup>2+</sup>, but this statement can only be confirmed if a direct comparison of  
363 the two ions is performed (e.g., Tris + Ca<sup>2+</sup> vs Tris + Mg<sup>2+</sup>). Together, these results suggest  
364 that the intracellular state stabilises aSyn in a relatively diverse set of monomeric  
365 conformations and net charge states and that these aggregate into a heterogeneous mixture

366 of fibrils, which could be associated with different biophysical properties, levels of toxicity  
367 and disease-relevance.

368 It is important to note that while this study presents correlations between local  
369 structural dynamics and aggregation in wild-type aSyn, there are a wide variety of familial  
370 mutations, post-translational modifications, and even different physiological buffers – all of  
371 which have the potential to change those site-specific correlations. For example, in the case  
372 of mutation H50Q, where a basic residue is swapped for an amidic one, the electrostatics  
373 are changed with removal of a formal charge, which may impact on the specific chemistry  
374 involved in nucleation/elongation processes, and the observed rate constant would  
375 decrease by 4.2x based on the intrinsic rates documented by Bai et al<sup>70</sup>. This would likely  
376 affect the correlation at this residue and any other structurally connected sites elsewhere in  
377 the protein. Thus, each aSyn variant and the chemical environment should be considered  
378 non-trivial to extrapolate and each deserves assessment.

379 In the present study, we found that deprotection in the centre of the C-terminal  
380 domain was found to be significantly correlated with the nucleation phase of the aggregation  
381 kinetics and we identified specific residues that influenced fibril growth. We also discovered  
382 that the morphology of certain fibril polymorphs was determined as early as during monomer  
383 nucleation. We anticipate that in the future, the tools and generally applicable approach that  
384 we present here will be able to make further important structure-function correlations for  
385 other physiological conditions and proteoforms of aSyn.

## 386 **METHODS**

### 387 **Materials**

388 All media and reagents were purchased from Sigma-Aldrich (UK) and were of analytical  
389 grade unless otherwise stated. Deuterium oxide (99.9% D<sub>2</sub>O) was purchased from Goss  
390 Scientific (catalogue number: DLM-4). E. coli BL21STAR (DE3) cells were purchased from  
391 Invitrogen (USA). Peptide P1 was synthesised using the method described in Phillips et al<sup>71</sup>.  
392 Details about the expression and purification of wild-type alpha-synuclein have been  
393 described previously<sup>21,72</sup>. aSyn refers to the wild-type variant of the protein in this paper.  
394 Three biological replicates were produced for the use in all experiments.

### 395 **Sample preparation**

396 Four buffer conditions were used in this study: Tris-only, extracellular, intracellular and  
397 lysosomal<sup>15</sup> (Table 1). aSyn samples from three different purification batches were removed  
398 from -80°C storage (15-25 µM stocks in Tris-only equilibrium buffer). For the Tris-only  
399 sample, the protein concentration was adjusted to 5 µM with Tris-only equilibrium buffer. For  
400 the extracellular sample, the salts were directly diluted into the 5 µM protein sample. For the  
401 intracellular and lysosomal samples, the protein was buffer exchanged into the matching  
402 equilibrium buffer for six cycles using 3K MWCO regenerated cellulose Amicon ultra  
403 centrifugal filters (Millipore, USA) and made to 5 µM.

#### 404 **Hydrogen-deuterium exchange mass spectrometry of alpha-synuclein samples**

405 For labelling times ranging between 50 ms and 5 min, hydrogen-deuterium exchange (HDX)  
406 was performed using a fully-automated, millisecond HDX labelling and online quench-flow  
407 instrument, ms2min<sup>49</sup> (Applied Photophysics, UK), connected to an HDX manager (Waters,  
408 USA). For each cellular condition and three biological replicates, aSN samples in the  
409 equilibrium buffer were delivered into the labelling mixer and diluted 20-fold with labelling  
410 buffer at 20°C, initiating HDX. The duration of the HDX labelling depended on the mixing  
411 loops of varying length in the sample chamber of the ms2min and the velocity of the carrier  
412 buffer. The protein was labelled for a range of times from 50 ms to 5 min. Immediately post-  
413 labelling, the labelled sample was mixed with quench buffer in a 1:1 ratio in the quench mixer  
414 to arrest HDX. The sample was then centred on the HPLC injection loop of the ms2min and  
415 sent to the HDX manager. For longer timepoints above 5 min, a CTC PAL sample handling  
416 robot (LEAP Technologies, USA) was used. Protein samples were digested onto an  
417 Enzymate immobilised pepsin column (Waters, USA) to form peptides. The peptides were  
418 trapped on a VanGuard 2.1 x 5 mm ACQUITY BEH C18 column (Waters, USA) for 3 minutes  
419 at 125 µL/min and separated on a 1 × 100mm ACQUITY BEH 1.7 µm C18 column (Waters,  
420 USA) with a 7-minute linear gradient of acetonitrile (5-40%) supplemented with 0.1% formic  
421 acid. Peptide samples did not require the initial peptic digestion step. The eluted peptides  
422 were analysed on a Synapt G2-Si mass spectrometer (Waters, USA). An MSonly method  
423 with a low collisional activation energy was used for peptide-only HDX and an MS/MS ETD  
424 fragmentation method was used for HDX-MS-ETD. Deuterium incorporation into the  
425 peptides and ETD fragments was measured in DynamX 3.0 (Waters, USA).

#### 426 **ETD fragmentation of aSN peptides**

427 The ETD reagent used was 4-nitrotoluene. The intensity of the ETD reagent per second,  
428 determined by the glow discharge settings, was tuned to give a signal of approximately 1e7  
429 counts per second (make-up gas flow: 35 mL/min, discharge current 65  $\mu$ A) to give efficient  
430 ETD fragmentation. Instrument settings were as follows: sampling cone 30 V, trap cell  
431 pressure 5e-2 mbar, trap wave height 0.25 V, trap wave velocity 300 m/s, transfer collision  
432 energy 8 V and transfer cell pressure 8e-3 mbar. Hydrogen-deuterium scrambling was  
433 measured using Peptide P1 under the same instrument conditions (Supplementary Figure  
434 6).

### 435 **Data analysis**

436 The raw data was processed, and assignments of isotopic distributions were reviewed in  
437 DynamX 3.0 (Waters, USA). The post-processing analysis was performed using HDfleX<sup>50</sup>.  
438 Briefly, the back-exchange-corrected data points for each peptide and ETD fragment were  
439 fitted using equation 1 in one-phase.

$$D_t = N \sum_{i=1}^{nExp} \left[ 1 - e^{-(k_{obs,i}t)^{\beta_i}} \right] \quad \text{Equation 1}$$

440 where  $D_t$  is the deuterium incorporation at time  $t$ ,  $nExp$  is the number of exponential phases,  
441  $N$  is the maximum number of labile hydrogens,  $k_{obs}$  is the observed exchange rate constant  
442 and  $\beta$  is a stretching factor.

443 As the rate of HDX is affected by pH and ionic strength, which are not controlled in this  
444 study, it is crucial to normalise the solution effects between the different conditions being  
445 compared. Here, we used an empirical approach to normalisation using the unstructured  
446 peptide bradykinin (RPPGFSPFR)<sup>51,52</sup> to deconvolute the solution effects of the HDX from  
447 the protein structural changes. Due to the unstructured nature of bradykinin, all the  
448 differences in deuterium uptake seen from the different buffers can be assumed to be strictly  
449 from the changes in the chemical exchange rate effects, rather than structural effects. By  
450 using bradykinin to calibrate the chemical exchange rate, we can now clearly distinguish the  
451 structural changes between the cellular conditions (Supplementary Figure 3). The ETD  
452 fragments were combined with the peptide data using HDfleX<sup>50</sup> to give the absolute uptake  
453 information across the entire protein as in Supplementary Figure 7.

### 454 **Statistical significance analysis**

455 The hybrid significance testing method along with data flattening used here as described  
456 elsewhere<sup>50</sup>.

#### 457 **Thioflavin-T (ThT) Binding Assay in 96-Well Plate**

458 Thioflavin – T (ThT) kinetic assays were used to monitor the aggregation of aSyn in different  
459 cellular compartments. For sample preparation, 40 µM (final concentration) of freshly made  
460 ThT solution (Abcam, Cambridge, UK) in distilled water was added to 50 µL of 40 µM, aSyn  
461 in 20 mM Tris pH 7.4, extracellular, intracellular, and lysosomal conditions as described in  
462 Table 1.

463 All samples were loaded in nonbinding, clear 96-well plates (Greiner Bio-One GmbH,  
464 Germany) which were then sealed with a SILVERseal aluminium microplate sealer (Grenier  
465 Bio-One GmbH). Fluorescence measurements were taken with FLUOstar Omega  
466 microplate reader (BMG LABTECH GmbH, Ortenbery, Germany). Excitation was set at 440  
467 nm and the ThT fluorescence intensity was measured at 480 nm emission with a 1300 gain  
468 setting. The plates were incubated with double orbital shaking for 300 s before the readings  
469 (every 60 min) at 300 rpm. Three repeats were performed with 6 replicates per condition.  
470 Each repeat was performed with a different purification batch of aSyn (biological replicate).  
471 Data were normalised to the well with the maximum fluorescence intensity for each plate  
472 and the empirical aggregation parameters  $t_{lag}$ ,  $t_{50}$ ,  $k$ , were calculated for each condition,  
473 based on the equation:

$$F(t) = \frac{F_{max}}{1 + 10^{-k(t-t_{50})}} \quad \text{Equation 2}$$

474 where  $F$  is the normalised fluorescence to the highest value recorded in the plate repeat,  
475  $F_{max}$  is the maximum fluorescence at the plateau,  $k$  is the slope of the exponential phase of  
476 the curve, and  $t_{50}$  is the time when  $F(t) = \frac{F_{max}}{2}$ .

477 One-way ANOVA was used to calculate statistical significance between samples using  
478 GraphPad Prism 8 (GraphPad Software, USA).

#### 479 **SEC-HPLC (Size exclusion–High-performance liquid chromatography)**

480 At the end of the ThT-based aggregation assays, the amount of remaining monomer of aSyn  
481 in each well was determined by analytical size exclusion chromatography with HPLC (SEC-  
482 HPLC). SEC analysis was performed on the Agilent 1260 Infinity HPLC system (Agilent  
483 Technologies, UK) equipped with an autosampler and a diode-array detector using a  
484 AdvanceBio 7.8 × 300mm 130 Å SEC column (Agilent Technologies, UK) in 20 mM Tris pH  
485 7.4 at 0.8 mL/min flow-rate. 25 µL of each sample was injected onto the column and the  
486 elution profile was monitored by UV absorption at 220 and 280 nm. The area under the peak  
487 in the chromatogram of absorption at 280 nm was determined and used to calculate the  
488 monomer concentration. Monomeric aSyn samples spanning from 5 µM to 40 µM aSyn were  
489 used to determine a standard curve, to allow calculation of the protein concentration for the  
490 ThT-based aggregation assay samples based on their area under the peak.

### 491 **AFM analysis of fibril morphology**

492 Fibrils formed at the end of ThT assays were analysed by AFM. A freshly cleaved mica  
493 surface was coated in 0.1% poly-L-lysine, washed with distilled H<sub>2</sub>O thrice and dried under a  
494 stream of nitrogen gas. Samples from the microplate wells were then incubated for 30 min  
495 on the mica surface. The sample was washed thrice in the buffer of choice (for example, in  
496 20 mM Tris, pH 7.4 for the Tris condition) to remove loose fibrils. Images were acquired in  
497 fluid using tapping mode on a BioScope Resolve AFM (Bruker, USA) using ScanAsyst-  
498 Fluid+ probes. 512 lines were acquired at a scan rate of 1.5 Hz per image with a field of view  
499 of 2-5 µm and for at least ten fields of view. Images were adjusted for contrast and exported  
500 from NanoScope Analysis 8.2 software (Bruker). Measurements of fibril height and  
501 periodicity were performed by cross-sectioning across the fibril and across the fibril axis in  
502 NanoScope Analysis 8.2 software (Bruker). Statistical analysis of the height and periodicity  
503 measurements was performed in GraphPad Prism 8 (GraphPad Software, USA).

### 504 **ACKNOWLEDGEMENTS**

505 NS is funded by a University Council Diamond Jubilee Scholarship (Exeter). JJP is supported by a  
506 UKRI Future Leaders Fellowship [Grant number: MR/T02223X/1]. GSK acknowledges funding from  
507 the Wellcome Trust (065807/Z/01/Z) (203249/Z/16/Z), the UK Medical Research Council (MRC)  
508 (MR/K02292X/1), Alzheimer Research UK (ARUK) (ARUK-PG013-14), Michael J Fox Foundation  
509 (16238) and Infinitus China Ltd. ADS and MZ acknowledge Alzheimer Research UK for travel grants.  
510 MZ acknowledges funding from Newnham College (Cambridge) and the George and Marie Vergottis  
511 Foundation (Cambridge Trust) and the British Biophysical Society (BSS) for travel grants. We thank



512 Dr Ioanna Mela for discussions on AFM for aSyn fibril morphology. For the purpose of open access,  
513 the author has applied a CC BY public copyright licence to any Author Accepted Manuscript version  
514 arising from this submission.

## 515 **COMPETING INTERESTS**

516 The authors declare no competing interests.

## 517 **AUTHOR CONTRIBUTIONS**

518 NS and MZ contributed equally. NS and JJP designed the study. NS, MZ and ADS prepared proteins  
519 for experiments. NS performed HDX-MS and ETD. NS and JJP performed correlative analyses. MZ  
520 performed kinetic aggregation assays and AFM experiments. NS and MZ analysed data. NS, MZ,  
521 ADS, GSK and JJP contributed to paper writing.

522 **Data Availability statement:** The authors declare that the data supporting the findings of  
523 this study are available in this paper and its supplementary information files. Source data  
524 are provided with this paper. All mass spectrometry .raw files will be available from the  
525 PRIDE repository [accession pending].

526 **Code Availability statement:** This study uses in-house developed software available to  
527 download: [<http://hdl.handle.net/10871/127982>]<sup>50</sup>. Supporting information shows additional  
528 code used to calculate the Pearson correlation coefficients and to plot the correlation plots  
529 at each amino acid.

530 **Supporting Information:** ThT, AFM and HDX mass spectrometry source data are provided in  
531 SourceData.xlsx.

## 532 **REFERENCES**

- 533 1. Dorsey, E. R. *et al.* Global, regional, and national burden of Parkinson's disease, 1990-  
534 2016: a systematic analysis for the Global Burden of Disease Study 2016. *Lancet Neurol.*  
535 **17**, 939–953.
- 536 2. Breydo, L., Wu, J. W. & Uversky, V. N.  $\alpha$ -Synuclein misfolding and Parkinson's disease.  
537 *Biochim. Biophys. Acta - Mol. Basis Dis.* **1822**, 261–285 (2012).
- 538 3. Uversky, V. N. Intrinsically disordered proteins from A to Z. *Int. J. Biochem. Cell Biol.* **43**,  
539 1090–1103 (2011).
- 540 4. Mahul-Mellier, A.-L. *et al.* The process of Lewy body formation, rather than simply  $\alpha$ -  
541 synuclein fibrillization, is one of the major drivers of neurodegeneration. *Proc. Natl. Acad.*  
542 *Sci.* **117**, 4971 LP – 4982 (2020).

- 543 5. Fauvet, B. *et al.*  $\alpha$ -Synuclein in Central Nervous System and from Erythrocytes, Mammalian  
544 Cells, and *Escherichia coli* Exists Predominantly as Disordered Monomer. *J. Biol. Chem.*  
545 **287**, 15345–15364 (2012).
- 546 6. Dedmon, M. M., Lindorff-Larsen, K., Christodoulou, J., Vendruscolo, M. & Dobson, C. M.  
547 Mapping Long-Range Interactions in  $\alpha$ -Synuclein using Spin-Label NMR and Ensemble  
548 Molecular Dynamics Simulations. *J. Am. Chem. Soc.* **127**, 476–477 (2005).
- 549 7. Esteban-Martín, S., Silvestre-Ryan, J., Bertoncini, C. W. & Salvatella, X. Identification of  
550 fibril-like tertiary contacts in soluble monomeric  $\alpha$ -synuclein. *Biophys. J.* **105**, 1192–1198  
551 (2013).
- 552 8. McClendon, S., Rospigliosi, C. C. & Eliezer, D. Charge neutralization and collapse of the C-  
553 terminal tail of alpha-synuclein at low pH. *Protein Sci.* **18**, 1531–1540 (2009).
- 554 9. Ranjan, P. & Kumar, A. Perturbation in Long-Range Contacts Modulates the Kinetics of  
555 Amyloid Formation in  $\alpha$ -Synuclein Familial Mutants. *ACS Chem. Neurosci.* **8**, 2235–2246  
556 (2017).
- 557 10. Uversky, V. N. *et al.* Biophysical Properties of the Synucleins and Their Propensities to  
558 Fibrillate: INHIBITION OF  $\alpha$ -SYNUCLEIN ASSEMBLY BY  $\beta$ - AND  $\gamma$ -SYNUCLEINS. *J. Biol.*  
559 *Chem.* **277**, 11970–11978 (2002).
- 560 11. Villar-Piqué, A., Fonseca, T. L. da & Outeiro, T. F. Structure, function and toxicity of alpha-  
561 synuclein: the Bermuda triangle in synucleinopathies. *J. Neurochem.* **139 Suppl**, 240–255  
562 (2015).
- 563 12. Baltic, S. *et al.*  $\alpha$ -Synuclein is expressed in different tissues during human fetal  
564 development. *J. Mol. Neurosci.* **22**, 199–203.
- 565 13. Wilhelm, B. G. *et al.* Composition of isolated synaptic boutons reveals the amounts of  
566 vesicle trafficking proteins. *Science* **344**, 1023–1028 (2014).
- 567 14. Lautenschläger, J., Kaminski, C. F. & Kaminski Schierle, G. S.  $\alpha$ -Synuclein - Regulator of  
568 Exocytosis, Endocytosis, or Both? *Trends Cell Biol.* **27**, 468–479 (2017).
- 569 15. Stephens, A. D., Zacharopoulou, M. & Schierle, G. S. K. The Cellular Environment Affects  
570 Monomeric  $\alpha$ -Synuclein Structure. *Trends Biochem. Sci.* **44**, 453–466 (2018).
- 571 16. Steiner, J. A., Angot, E. & Brundin, P. A deadly spread: cellular mechanisms of  $\alpha$ -synuclein  
572 transfer. *Cell Death Differ.* **18**, 1425–1433 (2011).
- 573 17. Domert, J. *et al.* Aggregated Alpha-Synuclein Transfer Efficiently between Cultured Human  
574 Neuron-Like Cells and Localize to Lysosomes. *PLoS One* **11**, e0168700 (2016).

- 575 18. Nikolettou, V. & Tavernarakis, N. Calcium homeostasis in aging neurons. *Front. Genet.*  
576 **3**, 200 (2012).
- 577 19. Boveris, A. & Navarro, A. Brain mitochondrial dysfunction in aging. *IUBMB Life* **60**, 308–314  
578 (2008).
- 579 20. Moons, R. *et al.* Metal ions shape  $\alpha$ -synuclein. *Sci. Rep.* **10**, 16293 (2020).
- 580 21. Stephens, A. D. *et al.* Extent of N-terminus exposure of monomeric alpha-synuclein  
581 determines its aggregation propensity. *Nat. Commun.* doi:10.1038/s41467-020-16564-3.
- 582 22. Lashuel, H. A. *et al.* Alpha-synuclein, especially the Parkinson's disease-associated  
583 mutants, forms pore-like annular and tubular protofibrils. *J. Mol. Biol.* **322**, 1089–1102  
584 (2002).
- 585 23. Spillantini, M. G., Crowther, R. A., Jakes, R., Hasegawa, M. & Goedert, M.  $\alpha$ -Synuclein in  
586 filamentous inclusions of Lewy bodies from Parkinson's disease and dementia with Lewy  
587 bodies. *Proc. Natl. Acad. Sci.* **95**, 6469 LP – 6473 (1998).
- 588 24. Bousset, L. *et al.* Structural and functional characterization of two alpha-synuclein strains.  
589 *Nat. Commun.* **4**, 2575 (2013).
- 590 25. Gath, J. *et al.* Unlike Twins: An NMR Comparison of Two  $\alpha$ -Synuclein Polymorphs Featuring  
591 Different Toxicity. *PLoS One* **9**, 1–11 (2014).
- 592 26. Fusco, G. *et al.* Structural basis of membrane disruption and cellular toxicity by  $\alpha$ -synuclein  
593 oligomers. *Science* **358**, 1440–1443 (2017).
- 594 27. Polymeropoulos, M. H. *et al.* Mutation in the  $\alpha$ -Synuclein Gene Identified in Families with  
595 Parkinson's Disease. *Science (80-. ).* **276**, 2045.
- 596 28. Krüger, R. *et al.* AlaSOPro mutation in the gene encoding  $\alpha$ -synuclein in Parkinson's  
597 disease. *Nat. Genet.* **18**, 106–108.
- 598 29. Pasanen, P. *et al.* A novel  $\alpha$ -synuclein mutation A53E associated with atypical multiple  
599 system atrophy and Parkinson's disease-type pathology. *Neurobiol. Aging* **35**, 2180.e1-  
600 2180.e5.
- 601 30. Zarranz, J. J. *et al.* The new mutation, E46K, of  $\alpha$ -synuclein causes parkinson and Lewy  
602 body dementia: New  $\alpha$ -Synuclein Gene Mutation. *Ann. Neurol.* **55**, 164–173 (2003).
- 603 31. Proukakis, C. *et al.* A novel  $\alpha$ -synuclein missense mutation in Parkinson disease. *Neurology*  
604 **80**, 1062.
- 605 32. Lesage, S. *et al.* G51D  $\alpha$ -synuclein mutation causes a novel Parkinsonian-pyramidal

- 606 syndrome: SNCA G51D in Parkinsonism. *Ann. Neurol.* **73**, 459–471 (2013).
- 607 33. Oueslati, A., Fournier, M. & Lashuel, H. A. Chapter 7 - Role of post-translational  
608 modifications in modulating the structure, function and toxicity of  $\alpha$ -synuclein: Implications  
609 for Parkinson's disease pathogenesis and therapies. in *Recent Advances in Parkinson's*  
610 *Disease: Basic Research* (eds. Björklund, A. & Cenci, M. A. B. T.-P. in B. R.) vol. 183 115–  
611 145 (Elsevier, 2010).
- 612 34. Kang, L. *et al.* N-terminal acetylation of  $\alpha$ -synuclein induces increased transient helical  
613 propensity and decreased aggregation rates in the intrinsically disordered monomer. *Protein*  
614 *Sci.* **21**, 911–917 (2012).
- 615 35. Kang, L., Janowska, M. K., Moriarty, G. M. & Baum, J. Mechanistic Insight into the  
616 Relationship between N-Terminal Acetylation of  $\alpha$ -Synuclein and Fibril Formation Rates by  
617 NMR and Fluorescence. *PLoS One* **8**, e75018 (2013).
- 618 36. Reissigl, H. Wasser- und elektrolythaushalt. *Int. J. Vitam. Nutr. Res.* 87–108 (1972).
- 619 37. Scott, C. C. & Gruenberg, J. Ion flux and the function of endosomes and lysosomes: pH is  
620 just the start. *BioEssays* **33**, 103–110 (2011).
- 621 38. Zhong, X. Z., Yang, Y., Sun, X. & Dong, X.-P. Methods for monitoring Ca<sup>2+</sup> and ion  
622 channels in the lysosome. *Cell Calcium* **64**, 20–28 (2017).
- 623 39. Raffaello, A., Mammucari, C., Gherardi, G. & Rizzuto, R. Calcium at the Center of Cell  
624 Signaling: Interplay between Endoplasmic Reticulum, Mitochondria, and Lysosomes. *Trends*  
625 *Biochem. Sci.* **41**, 1035–1049 (2016).
- 626 40. Biancalana, M. & Koide, S. Molecular mechanism of Thioflavin-T binding to amyloid fibrils.  
627 *Biochim. Biophys. Acta* **1804**, 1405–1412 (2010).
- 628 41. Sidhu, A., Vaneyck, J., Blum, C., Segers-Nolten, I. & Subramaniam, V. Polymorph-specific  
629 distribution of binding sites determines thioflavin-T fluorescence intensity in  $\alpha$ -synuclein  
630 fibrils. *Amyloid Int. J. Exp. Clin. Investig. Off. J. Int. Soc. Amyloidosis* **25**, 189–196 (2018).
- 631 42. Hackl, E. V, Darkwah, J., Smith, G. & Ermolina, I. Effect of acidic and basic pH on Thioflavin  
632 T absorbance and fluorescence. *Eur. Biophys. J.* **44**, 249–261 (2015).
- 633 43. Mikalauskaite, K., Ziaunys, M., Sneideris, T. & Smirnovas, V. Effect of Ionic Strength on  
634 Thioflavin-T Affinity to Amyloid Fibrils and Its Fluorescence Intensity. *International Journal of*  
635 *Molecular Sciences* vol. 21 (2020).
- 636 44. Santos, J. *et al.* pH-Dependent Aggregation in Intrinsically Disordered Proteins Is  
637 Determined by Charge and Lipophilicity. *Cells* vol. 9 (2020).

- 638 45. Hoyer, W. *et al.* Dependence of alpha-synuclein aggregate morphology on solution  
639 conditions. *J. Mol. Biol.* **322**, 383–393 (2002).
- 640 46. Sidhu, A., Segers-Nolten, I. & Subramaniam, V. Solution conditions define morphological  
641 homogeneity of  $\alpha$ -synuclein fibrils. *Biochim. Biophys. Acta* **1844**, 2127–2134 (2014).
- 642 47. Khurana, R. *et al.* A General Model for Amyloid Fibril Assembly Based on Morphological  
643 Studies Using Atomic Force Microscopy. *Biophys. J.* **85**, 1135–1144 (2003).
- 644 48. Keppel, T. R. & Weis, D. D. Mapping Residual Structure in Intrinsically Disordered Proteins  
645 at Residue Resolution Using Millisecond Hydrogen/Deuterium Exchange and Residue  
646 Averaging. *J. Am. Soc. Mass Spectrom.* **26**, 547–554 (2015).
- 647 49. Kish, M. *et al.* Allosteric regulation of glycogen phosphorylase solution phase structural  
648 dynamics at high spatial resolution. *bioRxiv* (2019) doi:10.1101/654665.
- 649 50. Seetaloo, N., Kish, M. & Phillips, J. J. HDfleX: Software for flexible high structural resolution  
650 of hydrogen/deuterium-exchange mass spectrometry data. *bioRxiv* 2021.12.09.471740  
651 (2021) doi:10.1101/2021.12.09.471740.
- 652 51. Kyle, D. J., Martin, J. A., Farmer, S. G. & Burch, R. M. Design and Conformational Analysis  
653 of Several Highly Potent Bradykinin Receptor Antagonists. *J. Med. Chem.* **34**, 1230–1233  
654 (1991).
- 655 52. Bonechi, C., Ristori, S., Martini, G., Martini, S. & Rossi, C. Study of bradykinin conformation  
656 in the presence of model membrane by Nuclear Magnetic Resonance and molecular  
657 modelling. *Biochim. Biophys. Acta - Biomembr.* **1788**, 708–716 (2009).
- 658 53. Hageman, T. S. & Weis, D. D. Reliable Identification of Significant Differences in Differential  
659 Hydrogen Exchange-Mass Spectrometry Measurements Using a Hybrid Significance  
660 Testing Approach. *Anal. Chem.* **91**, 8008–8016 (2019).
- 661 54. Wang, X., Moualla, D., Wright, J. A. & Brown, D. R. Copper binding regulates intracellular  
662 alpha-synuclein localisation, aggregation and toxicity. *J. Neurochem.* **113**, 704–714 (2010).
- 663 55. Fujiwara, H. *et al.*  $\alpha$ -Synuclein is phosphorylated in synucleinopathy lesions. *Nat. Cell Biol.*  
664 **4**, 160–164 (2002).
- 665 56. Barrett, P. J. & Greenamyre, J. T. Post-translational modification of  $\alpha$ -synuclein in  
666 Parkinson's disease. *Brain Res.* **1628**, 247–253 (2015).
- 667 57. Zhang, J., Li, X. & Li, J.-D. The Roles of Post-translational Modifications on  $\alpha$ -Synuclein in  
668 the Pathogenesis of Parkinson's Diseases. *Front. Neurosci.* **13**, 381 (2019).

- 669 58. Izawa, Y. *et al.* Role of C-terminal negative charges and tyrosine residues in fibril formation  
670 of  $\alpha$ -synuclein. *Brain Behav.* **2**, 595–605 (2012).
- 671 59. Afitska, K., Fucikova, A., Shvadchak, V. V & Yushchenko, D. A. Modification of C Terminus  
672 Provides New Insights into the Mechanism of  $\alpha$ -Synuclein Aggregation. *Biophys. J.* **113**,  
673 2182–2191 (2017).
- 674 60. Giasson, B. I., Murray, I. V. J., Trojanowski, J. Q. & Lee, V. M.-Y. A Hydrophobic Stretch of  
675 12 Amino Acid Residues in the Middle of  $\alpha$ -Synuclein Is Essential for Filament Assembly. *J.*  
676 *Biol. Chem.* **276**, 2380–2386 (2001).
- 677 61. Doherty, C. P. A. *et al.* A short motif in the N-terminal region of  $\alpha$ -synuclein is critical for both  
678 aggregation and function. *Nat. Struct. Mol. Biol.* **27**, 249–259 (2020).
- 679 62. Roeters, S. J. *et al.* Evidence for Intramolecular Antiparallel Beta-Sheet Structure in Alpha-  
680 Synuclein Fibrils from a Combination of Two-Dimensional Infrared Spectroscopy and Atomic  
681 Force Microscopy. *Sci. Rep.* **7**, 41051 (2017).
- 682 63. Lowe, R., Pountney, D. L., Jensen, P. H., Gai, W. P. & Voelcker, N. H. Calcium(II)  
683 selectively induces alpha-synuclein annular oligomers via interaction with the C-terminal  
684 domain. *Protein Sci.* **13**, 3245–3252 (2004).
- 685 64. Pálmadóttir, T., Malmendal, A., Leiding, T., Lund, M. & Linse, S. Charge Regulation during  
686 Amyloid Formation of  $\alpha$ -Synuclein. *J. Am. Chem. Soc.* **143**, 7777–7791 (2021).
- 687 65. Boyer, D. R. *et al.* The  $\alpha$ -synuclein hereditary mutation E46K unlocks a more stable,  
688 pathogenic fibril structure. *Proc. Natl. Acad. Sci.* **117**, 3592 LP – 3602 (2020).
- 689 66. Zhao, K. *et al.* Parkinson’s disease associated mutation E46K of  $\alpha$ -synuclein triggers the  
690 formation of a distinct fibril structure. *Nat. Commun.* **11**, 2643 (2020).
- 691 67. Wu, K.-P., Weinstock, D. S., Narayanan, C., Levy, R. M. & Baum, J. Structural  
692 reorganization of alpha-synuclein at low pH observed by NMR and REMD simulations. *J.*  
693 *Mol. Biol.* **391**, 784–796 (2009).
- 694 68. Hoyer, W., Cherny, D., Subramaniam, V. & Jovin, T. M. Impact of the acidic C-terminal  
695 region comprising amino acids 109-140 on alpha-synuclein aggregation in vitro.  
696 *Biochemistry* **43**, 16233–16242 (2004).
- 697 69. Lautenschläger, J. *et al.* C-terminal calcium binding of  $\alpha$ -synuclein modulates synaptic  
698 vesicle interaction. *Nat. Commun.* **9**, 712 (2018).
- 699 70. Bai, Y., Milne, J. S., Mayne, L. & Englander, S. W. Primary structure effects on peptide  
700 group hydrogen exchange. *Proteins* **17**, 75–86 (1993).



- 701 71. Phillips, J. J. *et al.* Rate of Asparagine Deamidation in a Monoclonal Antibody Correlating  
702 with Hydrogen Exchange Rate at Adjacent Downstream Residues. *Anal. Chem.* **89**, 2361–  
703 2368 (2017).
- 704 72. Stephens, A. D. *et al.* Different Structural Conformers of Monomeric  $\alpha$ -Synuclein Identified  
705 after Lyophilizing and Freezing. *Anal. Chem.* **90**, 6975–6983 (2018).
- 706

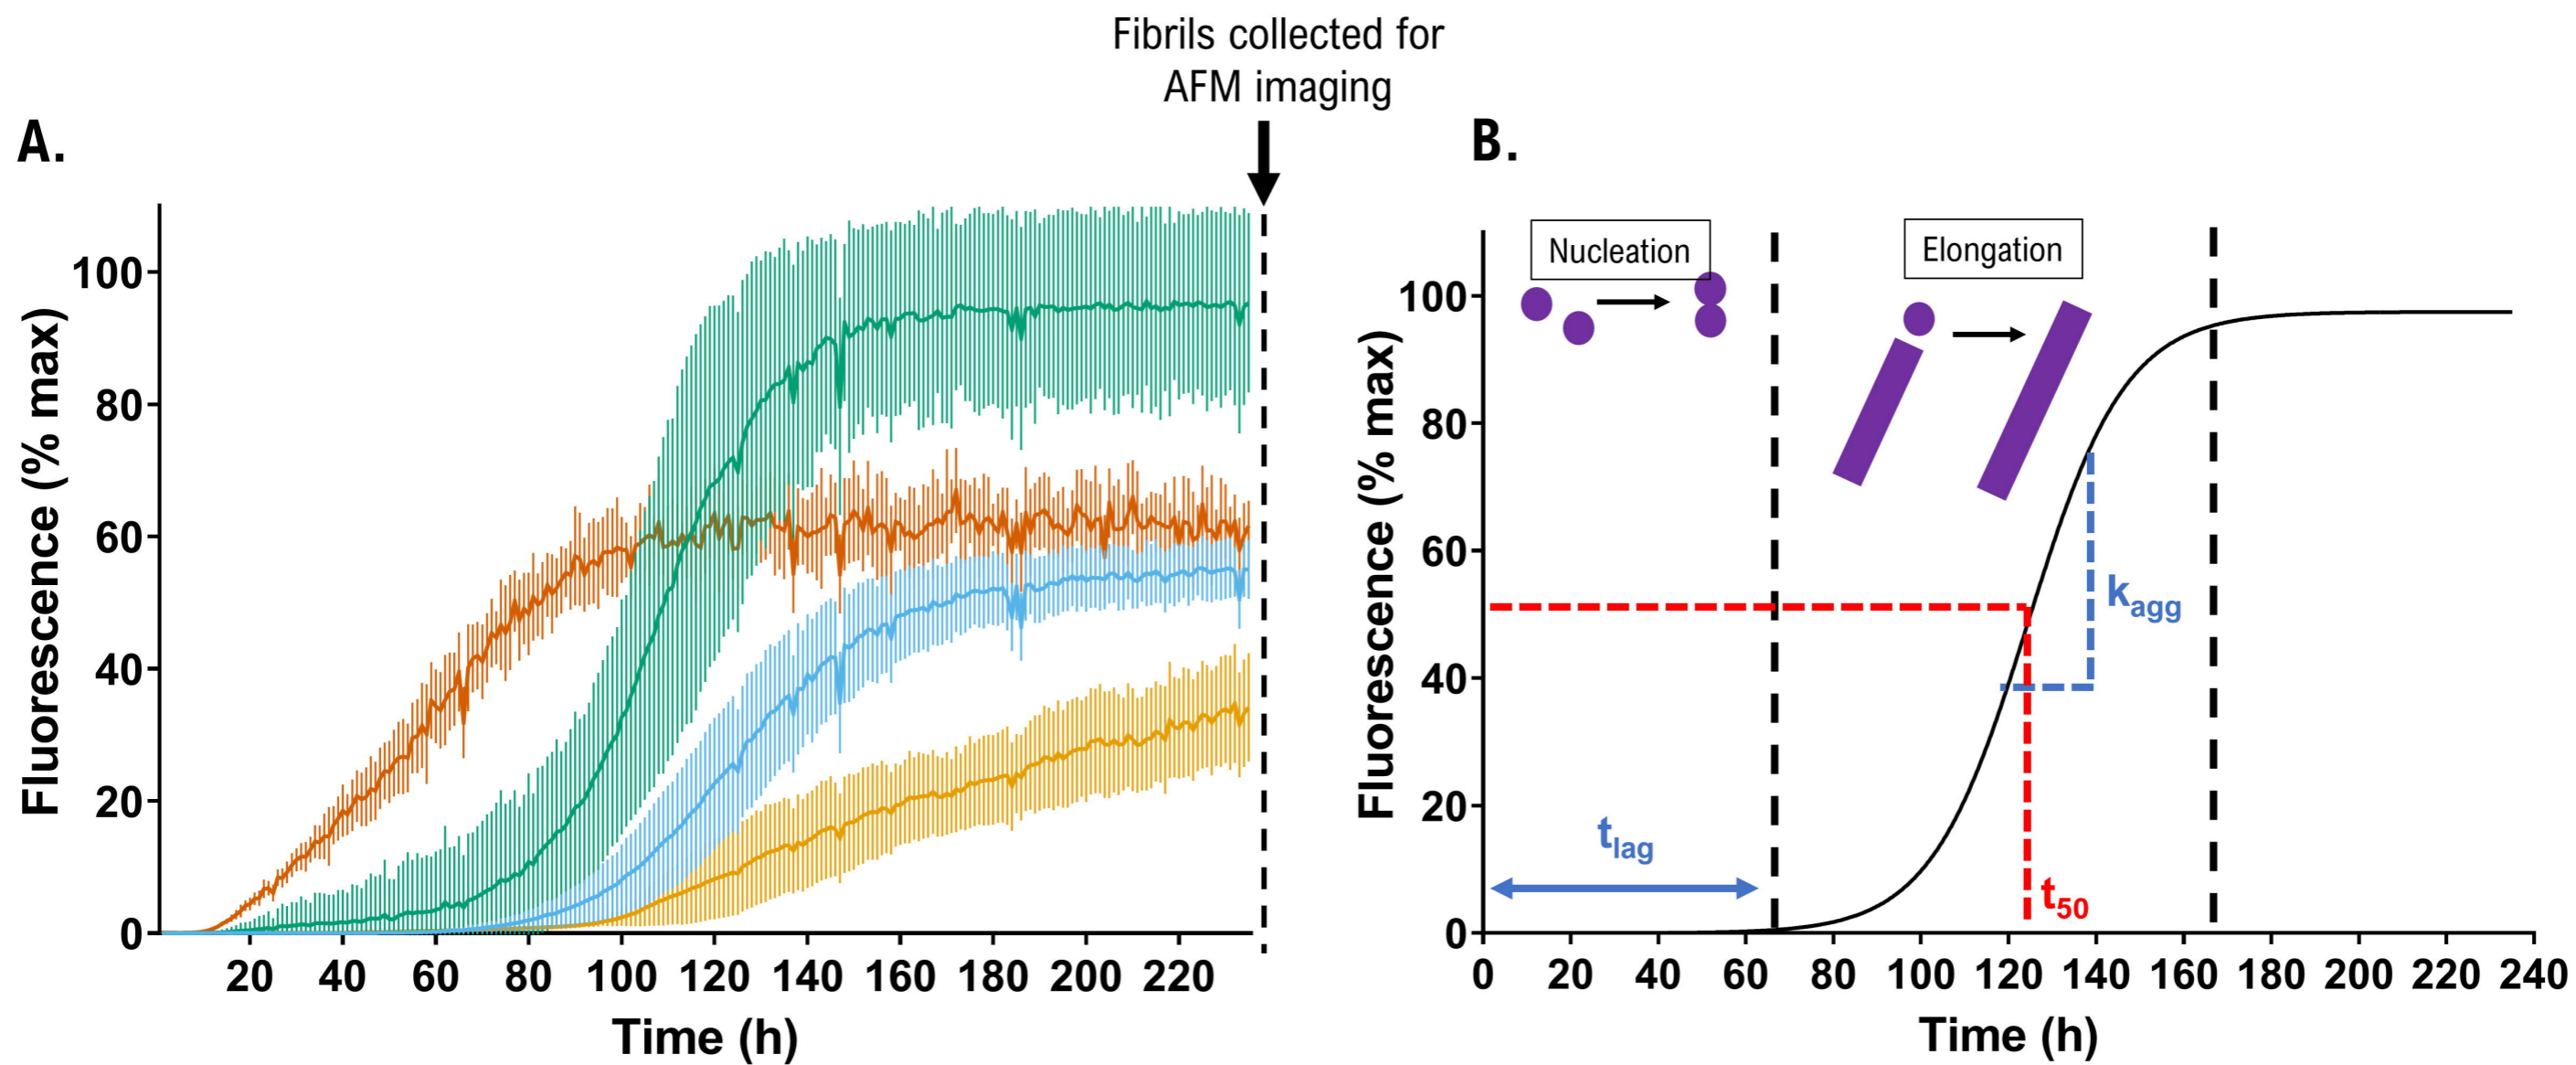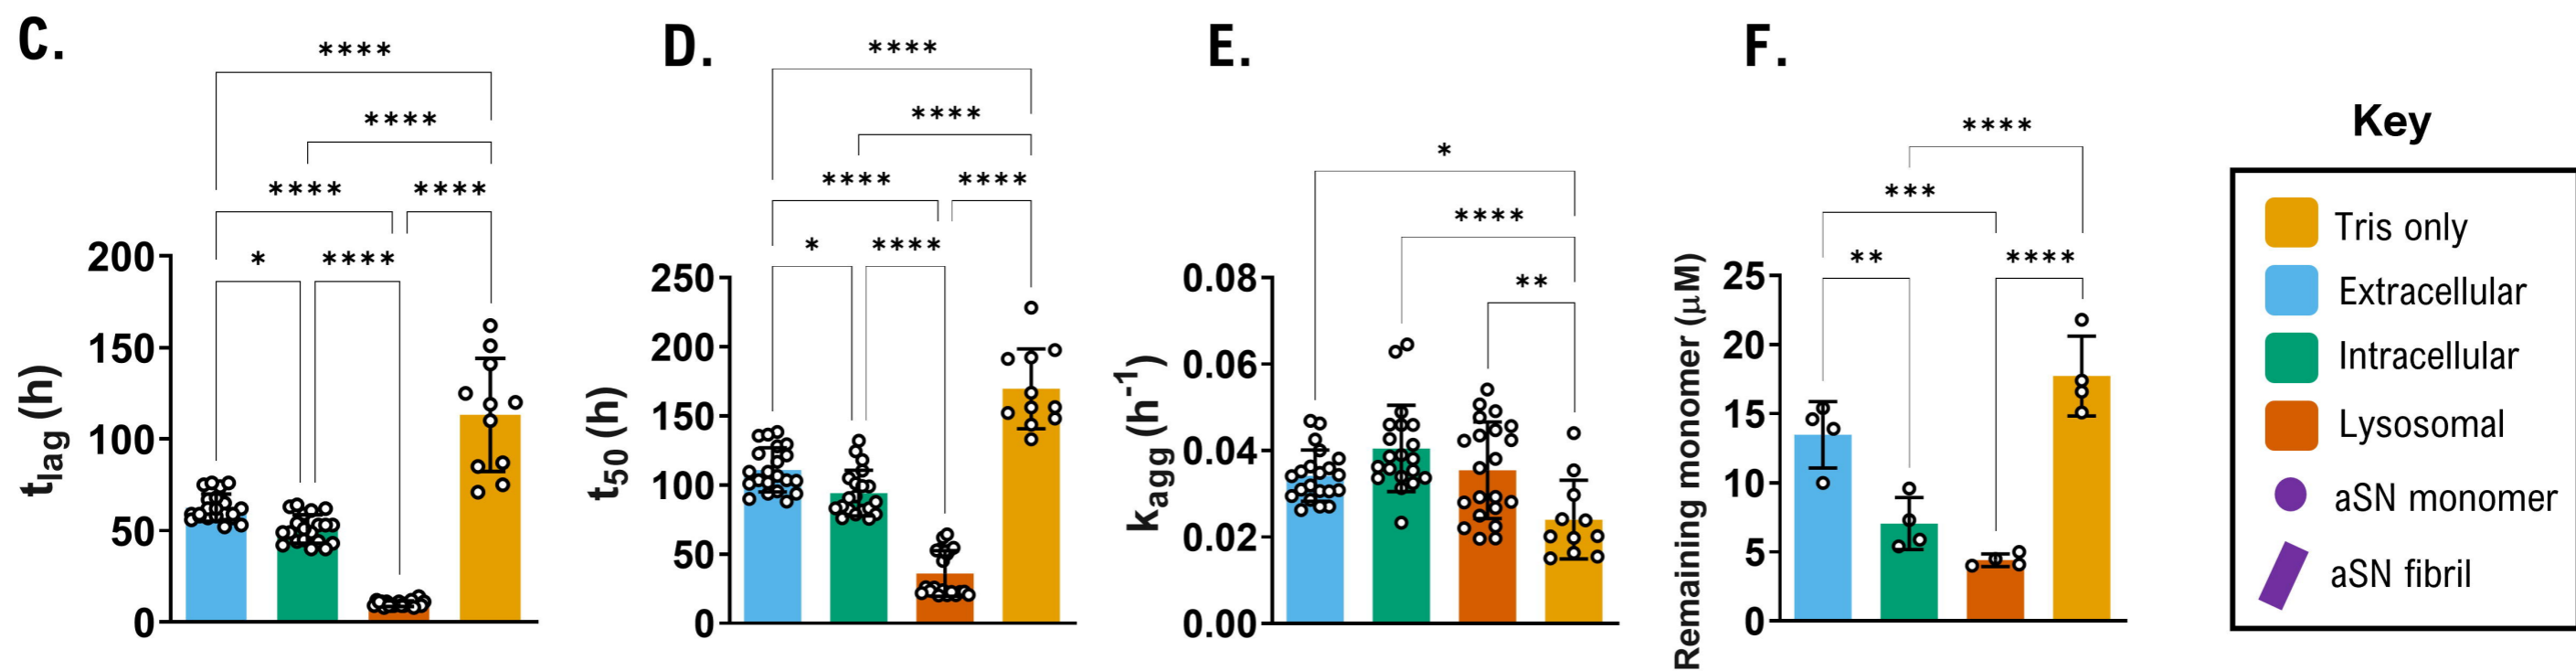

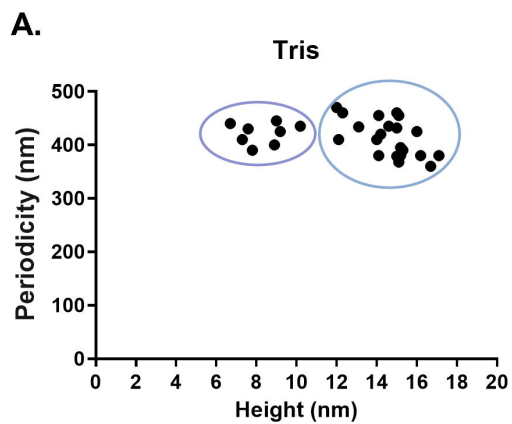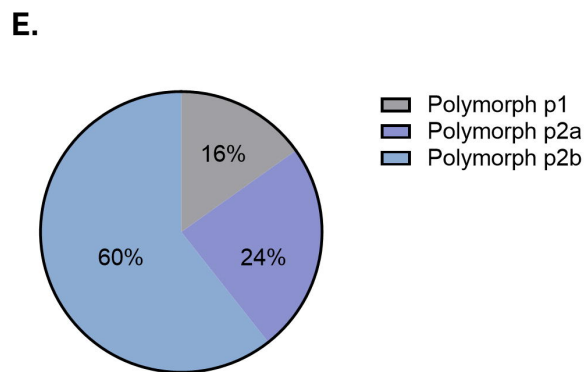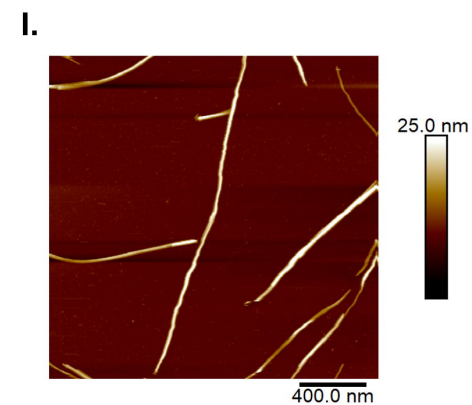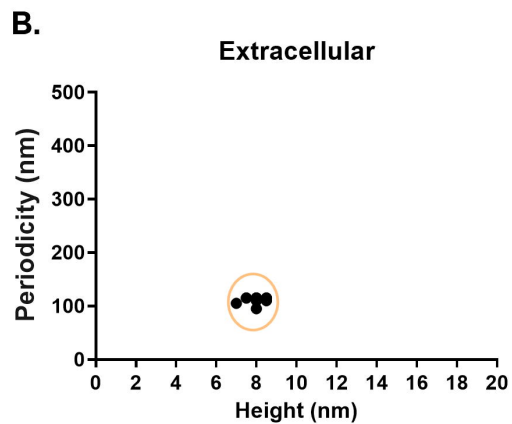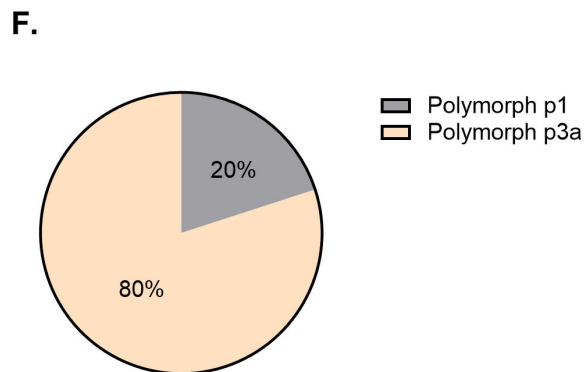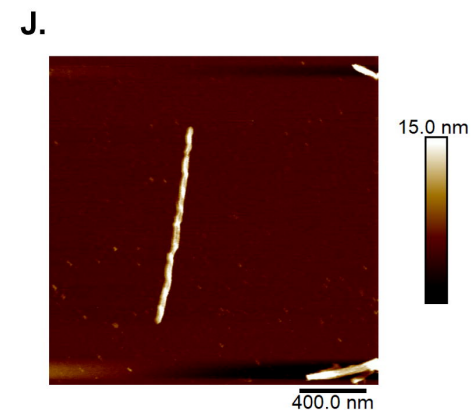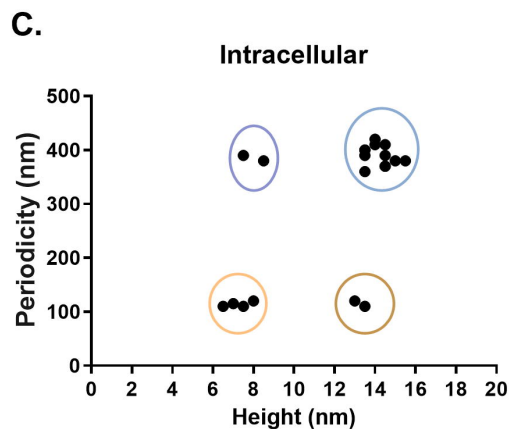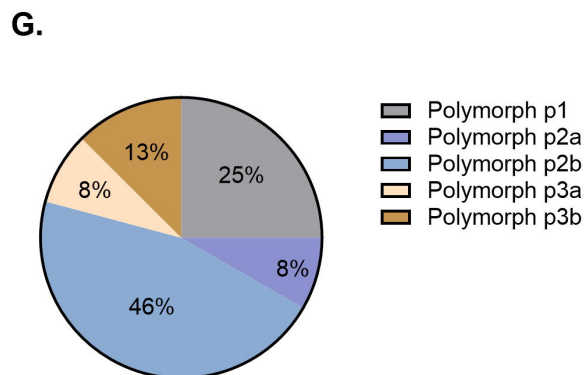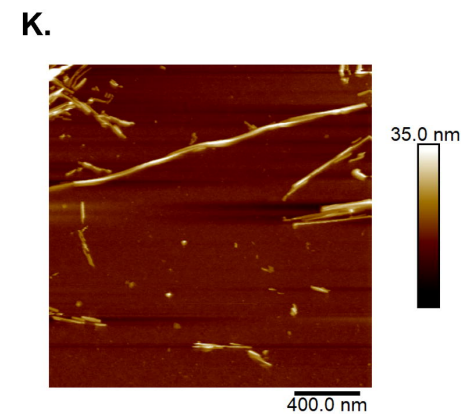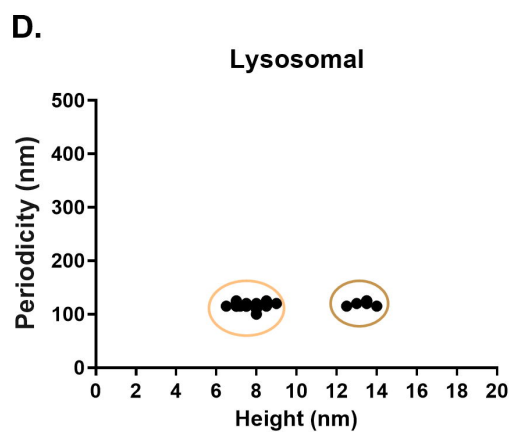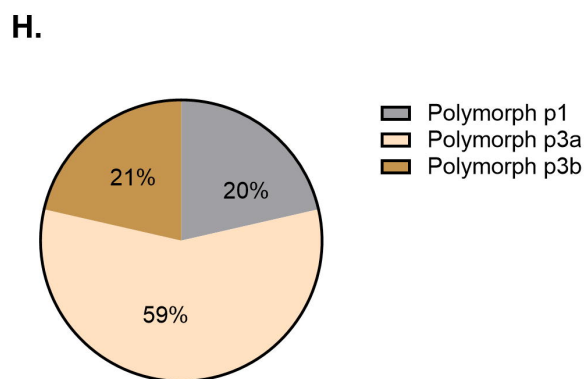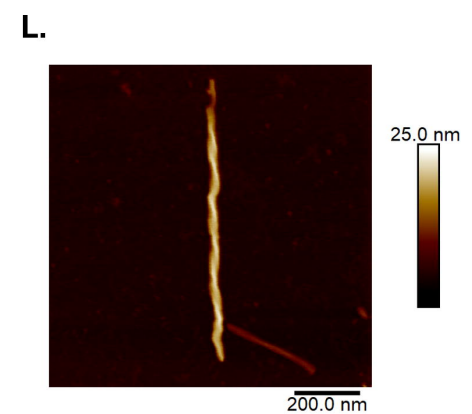

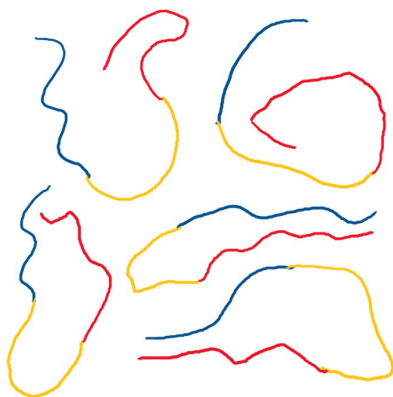

Wild type aSyn monomer

Tris only

Extracellular

Intracellular

Lysosomal

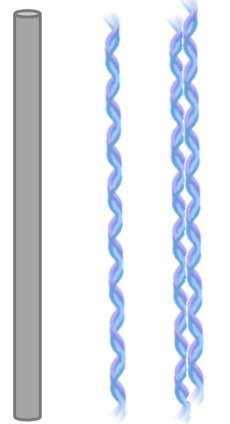

p1 p2a p2b

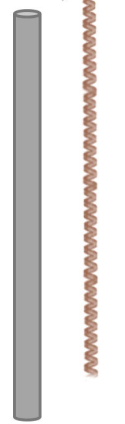

p1 p3a

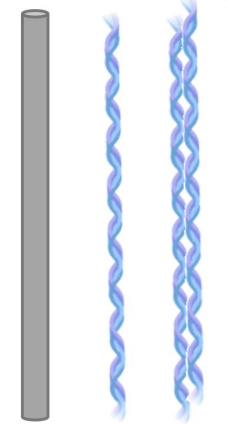

p1 p2a p2b

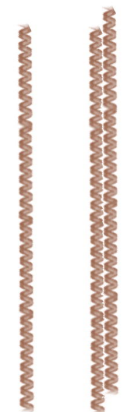

p3a p3b

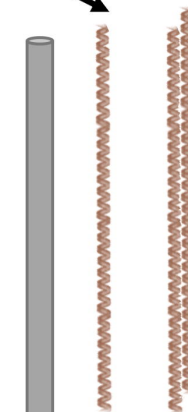

p1 p3a p3b

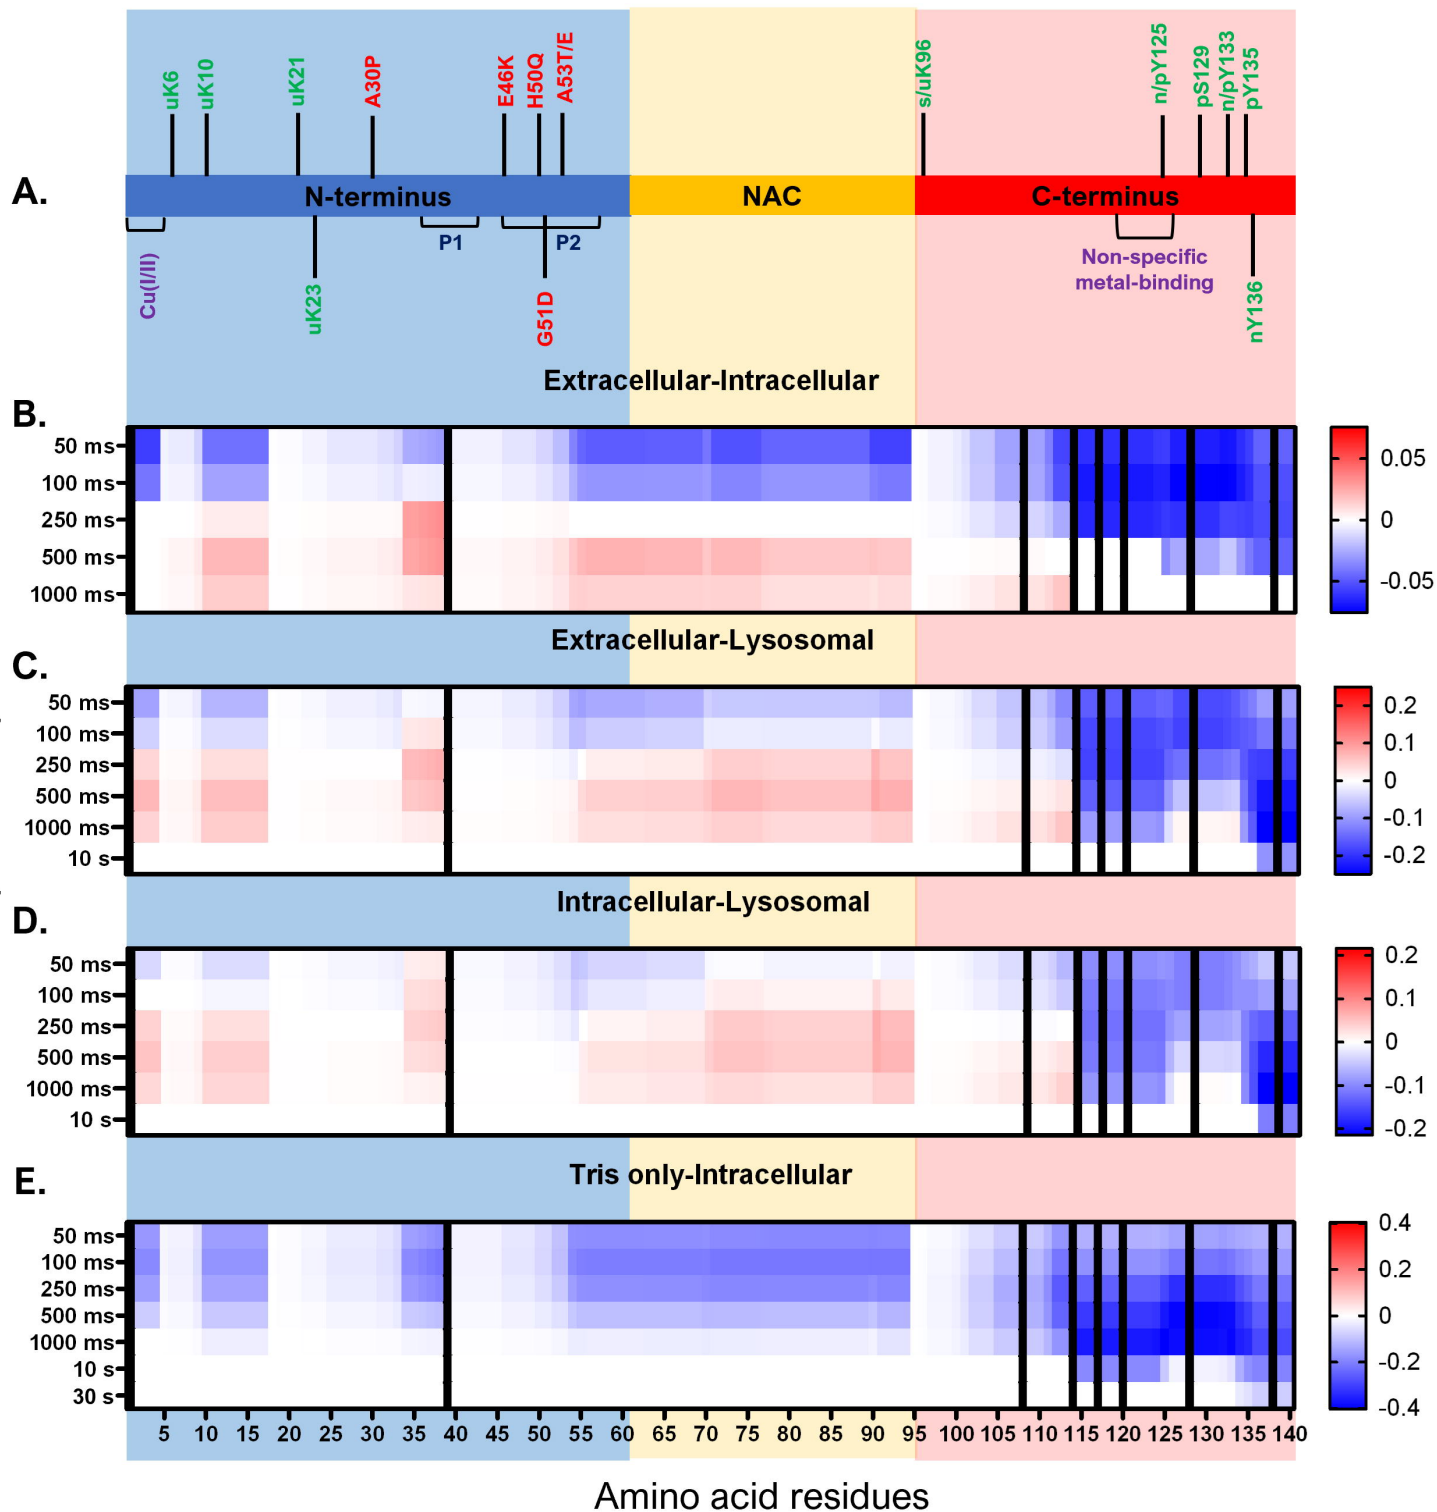

$\Delta$ uptake = State 1 – State 2

+ values:  $\uparrow$ D-labelling in State 1. Deprotection in 1. Protection in 2.

- values:  $\downarrow$ D-labelling in State 1. Protection in 1. Deprotection in 2.

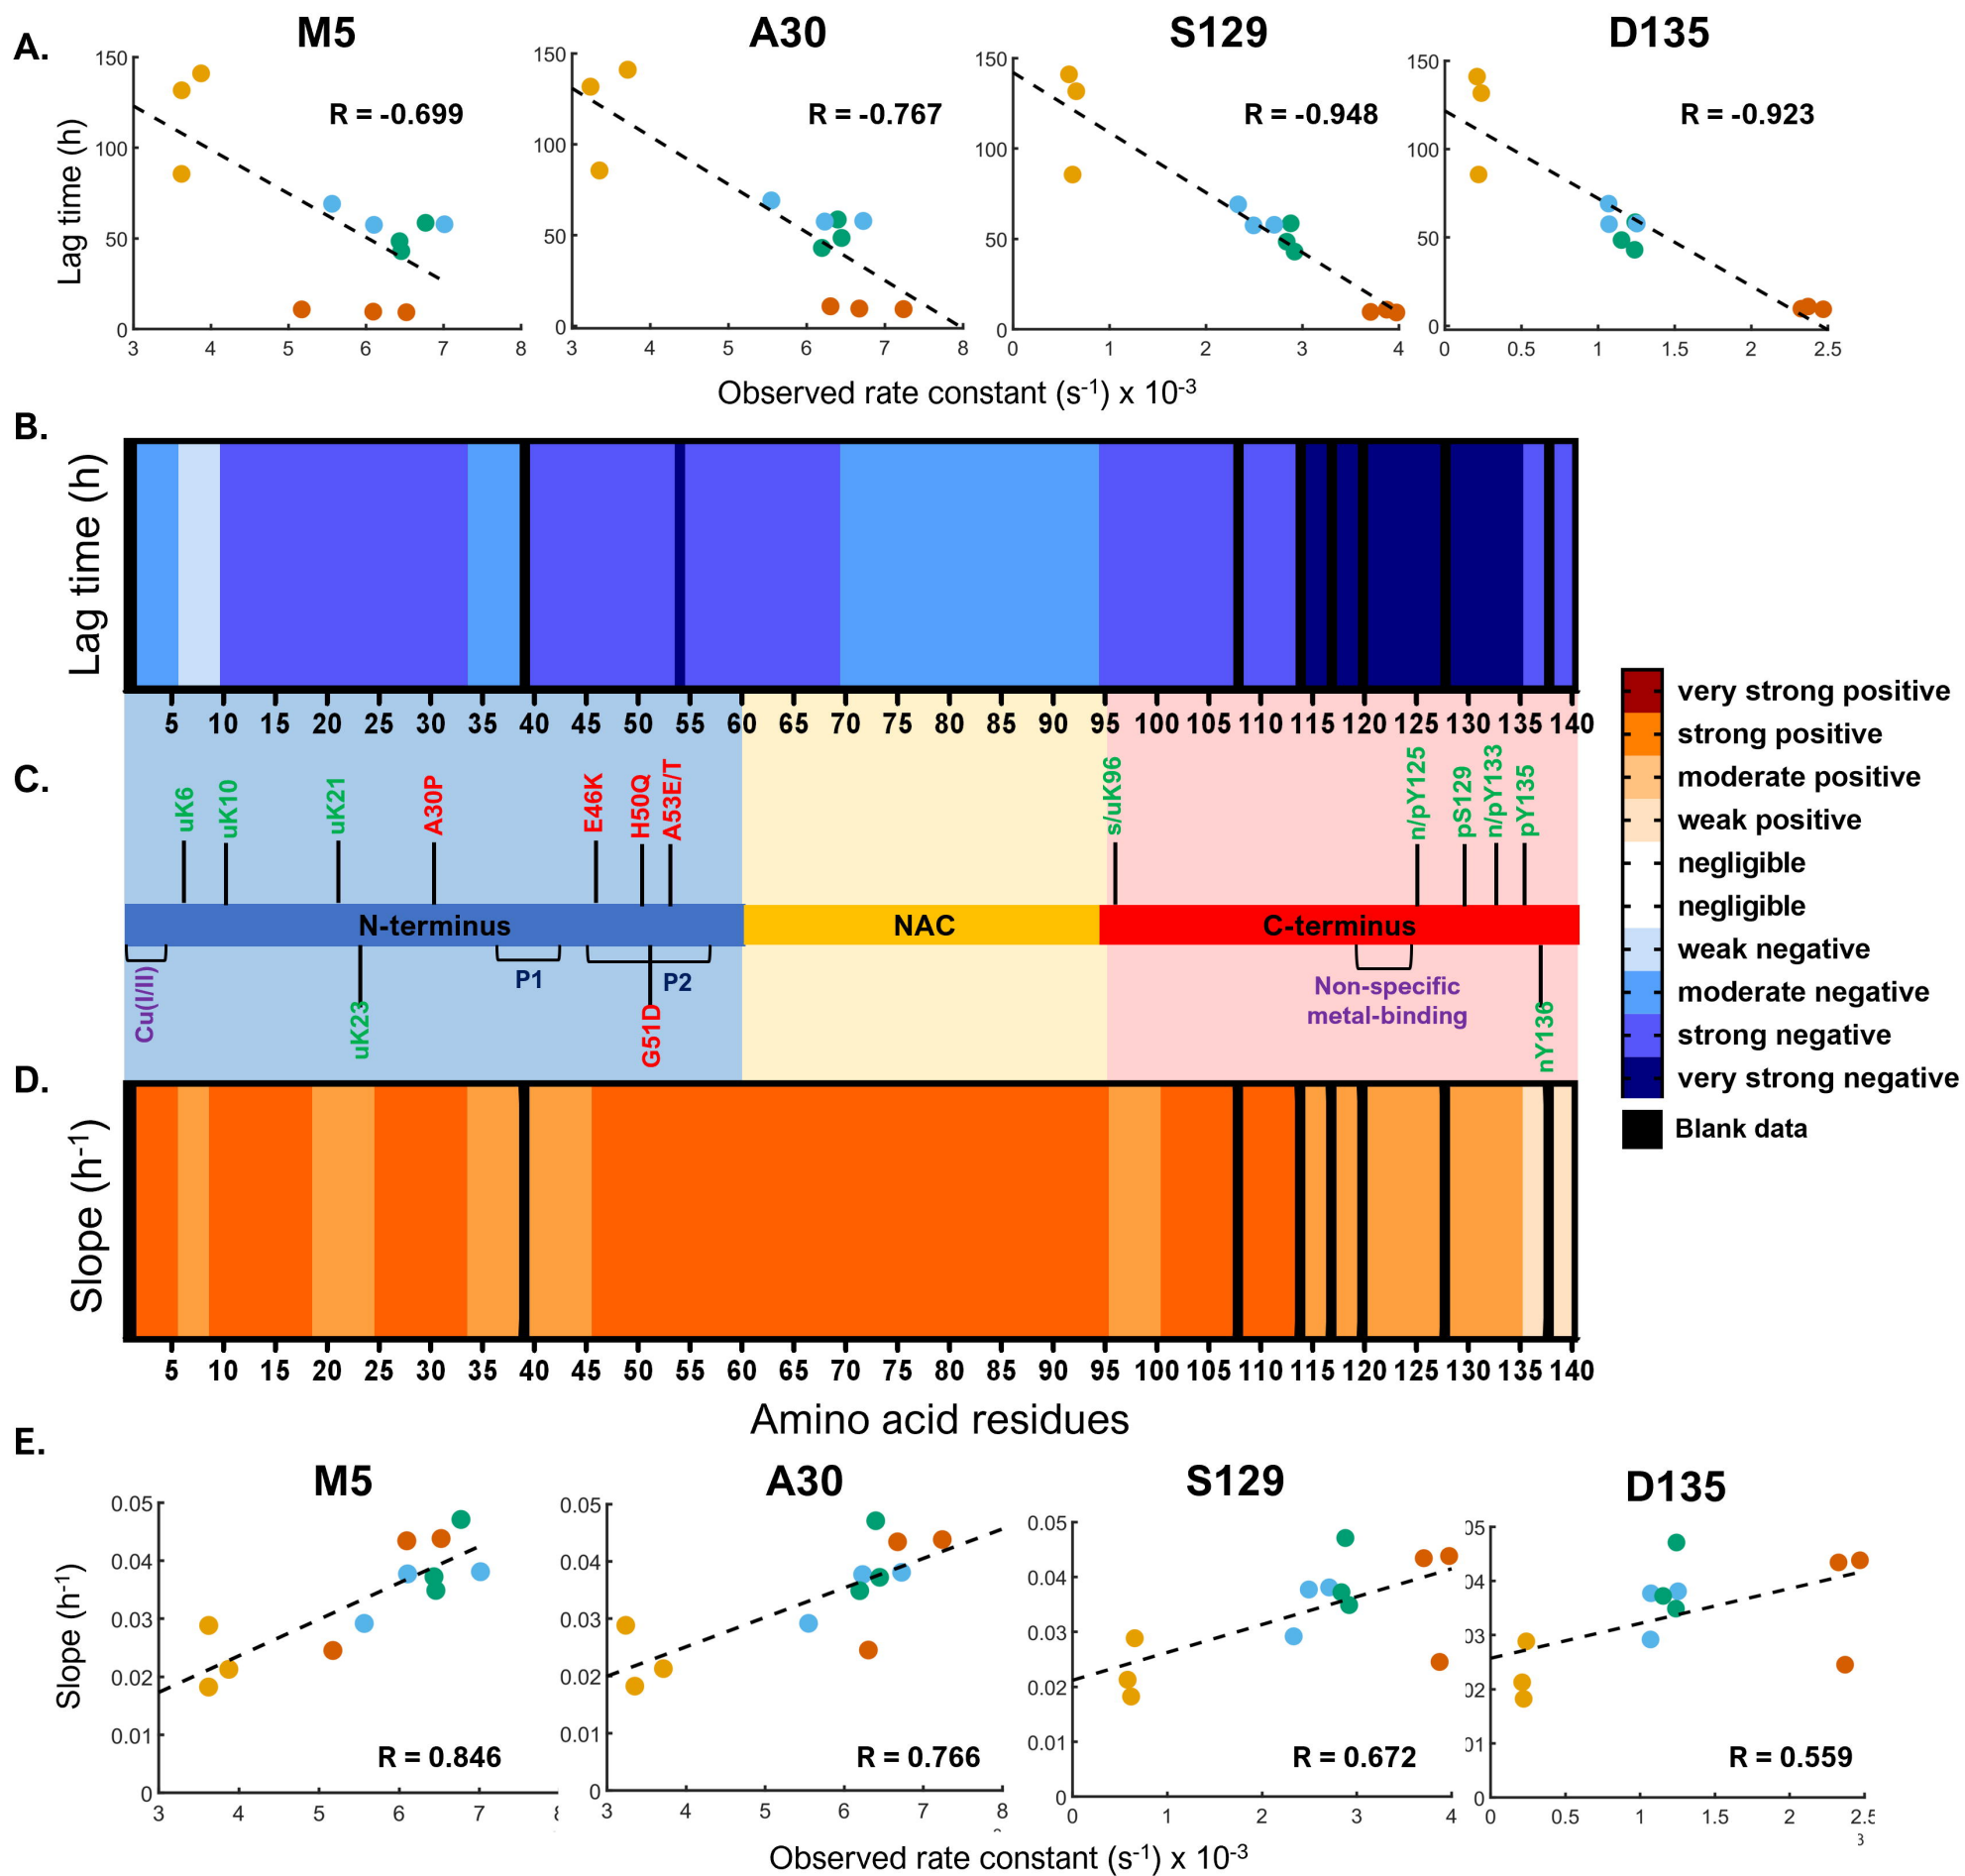

Source: https://www.biorxiv.org/content/10.1101/2022.02.11.480045v1.full.pdf
